# Supplementary material for: A new pipeline SPICE identifies novel JUN-IKZF1 composite elements
Source: bioRxiv preprint, doi:10.1101/2023.05.31.543110, version 2 (2024-12-12)
Supplement: Table 2 [file 543110_file04.xlsx]

## Sheet: interaction.matrix.SPICE.SYDH_T
Motifs_HOCOMOCO	A549Cebpb	A549Cmyc	A549Ctcfb	A549Max	A549Pol2s2	A549Rad21	Gm08714Znf274	Gm10847NfkbTnfa	Gm10847Pol2g	Gm12878Bhlhe40cg	Gm12878Brca1a300g	Gm12878Cdpsc6327g	Gm12878Cfos	Gm12878Chd1a301218ag	Gm12878Chd2ab68301g	Gm12878Ctcfsc15914c20	Gm12878E2f4g	Gm12878Ebf1sc137065	Gm12878Elk112771g	Gm12878Erra	Gm12878Gcn5	Gm12878Ikzf1iknucla	Gm12878Irf3g	Gm12878Jund	Gm12878Jund.1	Gm12878Mafkg	Gm12878Maxg	Gm12878Max	Gm12878Mazab85725g	Gm12878Mxi1g	Gm12878Nfe2sc22827	Gm12878NfkbTnfa	Gm12878Nfyag	Gm12878Nfybg	Gm12878Nrf1g	Gm12878P300b	Gm12878P300g	Gm12878P300sc584g	Gm12878Pol2g	Gm12878Pol2s2g	Gm12878Pol3	Gm12878Rad21	Gm12878Rfx5200401194g	Gm12878Smc3ab9263g	Gm12878Spt20	Gm12878Srebp1	Gm12878Srebp2	Gm12878Stat1	Gm12878Stat3g
AHR	7.73e-20	1	2.93e-08	2.88e-11	1	5.23e-16	9.88e-09	1	1	6.6e-13	1	1	1	1	1	2.42e-12	1	1	1	1	1	1	1	1	1	1	1.1e-08	1	1	1	1	1	1	1	0.000227	1	1	2.33e-23	1.19e-08	1	2.6e-15	0.000128	1	1.13e-15	1	1	1.19e-36	1	1
AIRE	9.6e-12	1	9.73e-21	1	1	1.55e-18	2.37e-17	1	1	1	1	1	1	1	8.76e-08	7.61e-17	1	1	1	1	3.12e-11	1	1	1	1	1	1	1	1	1	1	1	1	8.15e-23	1	4.73e-09	1	1	1	1	1	2.34e-20	1	1.15e-16	1	1	1	1	1
ALX1	2.05e-34	1	1.86e-08	1	1	4.94e-16	7.76e-22	1	1	1	9.16e-10	1	1	1	6.51e-08	1.38e-12	1	1	1	1	1	1	1	1	1	1	0.00025	1	1	1	1	1	1	1.63e-13	1	1	1	1	1	1	1	1.01e-18	1	1.39e-17	1	1	1	1	1
ANDR	6.83e-32	1	2.25e-08	4.59e-09	3.2e-08	2.83e-10	5.65e-36	1	1	1	1	1	1	1.56e-08	1	3.92e-08	1	1.73e-08	1	1	2.11e-10	2.9e-11	1	1	1	1	9.89e-10	1	7.43e-11	1	1	1	1	1.84e-27	0.000157	7.67e-09	1.86e-16	1.43e-08	0.000215	2.64e-09	1	1	3.49e-09	3.02e-09	1	1	6.06e-12	1.59e-11	8.08e-10
AP2A	1	1	4.81e-50	1.48e-08	1	1.4e-61	1.55e-08	2.76e-08	1	1	1	1	1	1	1	6.72e-55	1	1.44e-18	1	1	1	1	1	1	1	1	1	1	1	1	1	1	1	2.15e-18	1	1	1	1	1	1	1	6.96e-47	1	1.23e-56	1	1	6.8e-11	7.86e-19	1
AP2B	3.2e-127	1	3.45e-47	1	1	3.03e-54	1.07e-09	1	1	2.56e-13	1	1	1	1	1	5.97e-46	1	1	1	1	1	1	4.34e-12	1	1	1	1	1	1	1	3.12e-08	1	1.41e-13	1.67e-15	1	1	1	1	1	1	1	8.55e-39	1	4.28e-41	1	1	1.1e-15	1	1
AP2C	8.3e-72	1	5.19e-47	1	1	5.23e-19	1	1	1	1	1	1	1	1	1	5.21e-16	1	1	1	1	1	1	1	1	1	1	1	1	1	1	1	1	1	1e-09	1	1	1	1	1	1	1	4.47e-51	1	1.55e-17	1	1	1	1	1
ARI5B	1	5.73e-09	1.17e-81	1	1	7.33e-85	1	1	1	1	1	1	1	1	0.000165	8.88e-83	1	1.61e-75	1	1	1.78e-26	1	1	1	1	1	1	1	4.33e-09	0.000237	1	1	1	1.16e-146	0.000193	1.21e-10	1	1	1	1	1	1	3.24e-08	2.32e-81	1	1	1	0.000244	1
ARNT	1.65e-13	1	1.37e-13	2.2e-09	3.17e-08	7.71e-32	1	1	1	7e-12	1	1	1	1	1	3.03e-24	1	1	1	1	1	1	1.61e-12	1	1	1	8.23e-10	1	1	1	1	1	4.21e-25	6.02e-127	1	1	1	1.24e-18	0.00019	1	1.34e-13	2e-15	1	6.08e-26	1	1	1.3e-31	4.5e-08	1
ASCL1	4.8e-71	1	4.21e-20	1	1	7.82e-25	8.11e-09	1	1	1	1	1	1	1	1	2.55e-22	1	1	1	1.67e-09	1	1	1	1	1	1	1	1	1	1	1	1	1	5.16e-25	1	1	1	0.000126	1	1	1	1.45e-21	1	2.11e-20	1	1	1	1	1
ATF1	1	1	1.18e-09	1	1	1.91e-10	1	1	1	1	1	1	2.57e-10	1	1	2.13e-10	1	1	1.46e-123	1	1	1	3.69e-14	1	1	1	1	1	1	1	1	1	2.43e-20	3.7e-23	1	1	1	4.23e-08	1	1	1	9.56e-11	3.12e-38	1.79e-08	1	1	3.06e-10	1	1
ATF2	2.82e-22	1	1.24e-24	1	1	1.98e-39	1.11e-17	1	1	1	1	1	0.000132	1	1	8.45e-28	1	1	4.8e-52	1	1	1	1	1	1	1	1	1	1	1	1	1	1	5.79e-33	1	1	1	1	1	1	1	1.28e-18	6.01e-55	2.2e-21	1	1	1	1	1
ATF3	1.75e-10	1	5.07e-42	1	1	4.06e-24	0.00022	1	1	1	1	1	2.69e-14	1	1	6.75e-21	1	3.97e-10	9.13e-10	1	9.05e-45	1	9.66e-15	1	1	1	1	1	1	1	1	1	3.05e-53	8.15e-238	1	1	1	1.01e-10	1	1	1.8e-09	1.78e-33	1.39e-77	8.46e-20	1	1	3.28e-25	1	1
ATF4	2.95e-30	1	1.73e-16	1	1	3.93e-34	1	1	1	1	1	1	1	1	1	1.93e-29	1	1	1.26e-14	1	1	1	1	1	1	1	1	1	1	1	1	1	1	6.85e-09	1	1	1	1	1	1	1	1.26e-22	5.4e-11	1.05e-25	1	1	1	1	1
ATF6A	1	1	1	1	1	1	1	1	1	1	1	1	1	1	1	1	1	1	8.9e-15	1	1	1	2.43e-13	1	1	1	1	1	1	1	1	1	4.44e-21	1.22e-48	1	1	1	1	1	1	0.000125	1	4.16e-10	1	1	1	1	1	1
ATOH1	1	1	7.55e-15	1	1	4.49e-17	9.01e-10	1.27e-08	1	1	1	1	1	1	1	7.21e-18	1	1	1	9.34e-10	1	1	1	1	1	1	1	1	1	1	1	1	1	2.22e-66	1	1.63e-11	1	1	1	1	1	1.38e-17	3.42e-09	3.96e-17	1	1	1	1	9.71e-15
BACH1	1.99e-99	1	4.97e-51	1	1	1.54e-30	2.78e-14	1	1	1	1	1	1	1	1	6.42e-26	1	1.11e-08	1	1	1	1	1	1	1	1	1	1	1	1	1	1	8.2e-16	1.03e-51	1	1	1	1	1	1	1	2.12e-40	2.36e-17	6.42e-28	1	1	1	1	1
BACH2	5e-67	1	1.3e-27	1	1	2.12e-25	1.12e-16	1	1	1	1	1	1	1	1	4.02e-23	1	3.57e-09	6.18e-11	1	1.58e-14	1	1	1	1	1	1	1	1	1	1	1	1.29e-14	2.31e-75	1	5.61e-09	7.08e-09	1	1	1	1	2.71e-21	3.68e-22	5.97e-23	1	1	1	1	1
BATF	2.72e-26	1	1	1	1	2.99e-11	5.57e-58	1	1	1	1	1	1	1	1	6.03e-12	1	1	1	1	1	1	1	1	1	1	1	1	1	1	1	1	1	1	1	5.82e-09	2.84e-08	8.61e-10	1	1	1	1	1	3.14e-11	1	1	1	1	1.14e-11
BATF3	1.67e-42	1	2.05e-32	0.000161	1	6.14e-41	3.25e-68	1	1	1	1	1	1	9.22e-10	1	2.35e-51	1	1	3.01e-08	1	1.24e-19	1	1	1	1	1	0.000254	1	5.98e-10	1	1	1	1	4.95e-27	1	6.72e-17	3.76e-09	3.54e-08	1	1.14e-08	1	5.52e-37	1	1.08e-50	8.24e-09	1	2.24e-10	8.79e-10	1.78e-10
BC11A	1.27e-11	1	4.91e-196	1	1	1.61e-208	1.3e-11	1	1	1	1	1	1	1	1	5.83e-229	1	1	8.46e-15	0.000127	8.82e-19	9.13e-13	1	1	1	1	1	1	1.37e-08	1	5.2e-61	1	4.1e-15	5.75e-172	1	2.76e-10	1.55e-13	1	1	1	1	6e-175	1	3.48e-224	1	1	1	1	1
BCL6	4.18e-11	1	8.68e-32	1	1	3.53e-38	3.76e-13	1	1	1	1	1	1	1	1	1.87e-34	1	1	1	1	6.3e-13	1	1	1	1	1	1	1	1	1	1	1	0.000155	7.35e-24	1	1	1	1	1	1	1	2.7e-26	1	8.68e-34	1	1	1	1	1
BHA15	1.76e-19	1	2.91e-26	1	1	4.54e-32	7.52e-13	4.56e-09	1	1	1	1	1	1	1	1.11e-31	1	1	1	1.15e-08	1	1	1	1	1	1	1	1	1	1	1	4.86e-09	1	7.3e-82	1	1	1	1	1	1	1	4.87e-22	1	4.41e-33	1	1	1	1	1.42e-10
BHE40	7.07e-17	1	1.7e-29	1.53e-11	3.48e-09	2.23e-26	2.34e-14	1	1	5.9e-09	1	1	6.85e-13	1	1	4.17e-28	1	1	1	1	1	1	1.32e-21	1	1	1	1	1	1	1	5.94e-10	1	3.09e-179	9.99988867182683e-321	1	1	1	4.66e-09	1	1	1	6.35e-29	2.02e-15	6.11e-34	1	1	7.44e-22	1	1
BMAL1	6.16e-16	1	1.49e-27	1.53e-11	3.79e-08	3.14e-28	1.27e-14	1	1	5.9e-09	1	1	6.85e-13	1	1	4.25e-27	1	1	1	1	1	1	2.5e-20	1	1	1	1	1	1	1	3.35e-09	1	3.36e-176	9.99988867182683e-321	1	1	1	5.35e-08	1	1	1	4.51e-19	1.36e-14	1.39e-33	1	1	7.44e-22	1	1
BRAC	4.58e-91	1	3.93e-53	1	1	6.98e-58	2.06e-57	1	1	1	0.000114	1	1	1	6.2e-14	1.06e-56	1	7.95e-08	1	1	1.07e-40	0.000225	1	1	1	1	1	1	1	1	9.75e-10	1	1	1.13e-18	1	0.000112	4.74e-48	6.25e-08	1	1	8.54e-09	4.66e-38	6.41e-14	1.52e-48	1	1	1.32e-23	1	1
CDX1	2.46e-16	1	1.45e-23	1	1	1.22e-38	6.32e-21	1	1	1	6.74e-14	1	1	1	8.75e-12	1.87e-26	1	0.000126	1	1	8.33e-35	1	1	1	1	1.05e-11	1	1	1	1	1	1	1	4.39e-64	1	2.28e-14	1	1	1	1	1	1.17e-25	1	7.25e-30	1	1	1.7e-11	1	1
CDX2	3.71e-10	1	2.49e-59	1	1	3.1e-37	5.56e-40	1	1	1	1	1	1	1	1	2e-41	1	1	1	1	1	1	1	1	1	1	1	1	1	1	2.41e-11	1	1	1.75e-103	1	1	5.59e-09	1.28e-14	1	1	1	2.64e-45	1.06e-11	1.2e-41	1	1	1	1	1
CEBPA	8.22e-53	1	2.83e-60	1	1	1.32e-78	1.5e-70	1	1	1	1	1	1	1	1	1.28e-84	1	1.21e-10	7.42e-09	5.27e-09	4.16e-12	1	1	1	1	1	1	1	1	1	1	1	1	1	1	6.2e-10	1	1	1	1	1	5.97e-54	1	4.52e-72	1	1	1	1	1
CEBPB	6.09e-47	1	5.65e-56	1	1	1.05e-77	1.29e-73	1	1	1	1	1	1	1	1	7.14e-75	1	2.13e-12	1	1	2.01e-10	1	1	1	1	1	1	1	1	1	1	1	1	7.3e-09	1	1	1	1	1	1	1	1.89e-50	1	7.42e-68	1	1	1	1	1
CEBPD	5.76e-41	1	2.32e-89	1	1	6.37e-115	3.32e-70	1	1	1	1	1	1	1	1	1.53e-121	1	2.63e-09	1.74e-08	1	3.76e-09	1	1	1	1	1	1	1	1	1	1	1	1	1.5e-11	1	0.000171	1	1	1	1	1	1.72e-86	2.35e-08	5.05e-115	1	1	1	1	1
CEBPE	4.44e-58	1	4.61e-59	0.000167	1	2.39e-61	2.16e-13	1	0.000144	1	1	1	1	1	1	8.2e-60	1	4.89e-09	1	1.06e-10	8.71e-17	1	1	1	1	1	1	1	1	1	2.29e-81	1	3.73e-21	5.09e-82	1	1	1	1	1	1	1	3.57e-55	0.000258	5.86e-62	1	1	1.69e-13	1	1
CEBPG	1.03e-34	1	4.68e-31	1	1	2.89e-57	1	1	1	1	1	1	1	1	1	2.13e-45	1	1	3.28e-16	1.94e-09	2.79e-09	1	1	1	1	1	1	1	1	1	1	1	1	3.81e-09	1	1	1	1	1	1	1	4.09e-37	3.97e-21	3.02e-41	1	1	1	1	1
CLOCK	7.28e-44	1	4.39e-43	5.29e-10	0.00016	6.16e-40	4.93e-21	1	1	4.55e-09	1	1	6.56e-10	1	1	1.49e-40	1	1	1	1	3.21e-36	1	3.8e-19	1	1	1	1	1	1	1	2.78e-08	1	4.82e-169	9.99988867182683e-321	1	1	1	7.32e-08	1	1	1	1.64e-33	1.77e-09	1.09e-49	1	1	1	1	1
COE1	4.86e-71	1	1.59e-09	1	1	5.78e-08	2.68e-54	1	1	1	1	0.00022	1	1	1	6.59e-08	1	6.59e-17	1	1	1	1	1	1	1	1	1	1	1	1	1	1	1	2.2e-10	1	1	1	1	1	1	1	1.09e-10	1	7.27e-09	1	1	1	1	1
COT1	0.000169	1	2.29e-58	1	1	1.77e-103	3.83e-11	1	1	1	1	1.22e-08	1	1	1	1.86e-82	1	1	3.49e-16	2.96e-12	1	1	1	1	1	1	1	1	1	1	1	1	1.17e-24	9.8e-140	1.75e-09	1	1	1.04e-10	1	1	1	2.41e-49	1	2.76e-84	1	1	0.000165	1	1
COT2	0.000169	1	6.12e-41	1	1	4.11e-79	1.68e-11	1	1	1	1	0.000112	1	1	1	4.82e-38	1	1	1.25e-09	2.25e-14	1	1	1	1	1	1	1	1	1	1	0.000148	2.19e-08	1.17e-24	1.14e-168	0.000208	1	1	1	1	1	1	2.06e-39	5.09e-08	1.08e-60	1	1	8.57e-10	1	1
CREB1	1	1	1.18e-09	1	1	1.91e-10	1	1	1	1	1	1	2.57e-10	1	1	2.13e-10	1	1	1.46e-123	1	1	1	3.69e-14	1	1	1	1	1	1	1	1	1	2.43e-20	3.7e-23	1	1	1	4.23e-08	1	1	1	9.56e-11	3.12e-38	1.79e-08	1	1	3.06e-10	1	1
CREM	1	1	1	1	1	1.98e-10	0.000188	1	1	1	1	1	8.76e-10	1	1	1.66e-09	1	1	2.58e-62	1	2.58e-11	1	1	1	1	1	1	1	1	1	1	1	2.49e-08	7.47e-19	1	1	1	1	1	1	1	1	1.9e-54	1.96e-09	1	1	1	1	1
CRX	4.73e-32	1	4.95e-21	1	1	1.31e-31	2.55e-17	1	1	1	1	1	1	1	2.45e-08	5.12e-18	1	1	1	1	6.11e-09	1	1	1	1	1	1	1	1	1	1	1	1	1.45e-60	1	1	1	3.2e-57	1	1.05e-12	6.8e-37	9.28e-31	2.34e-09	5.19e-22	1	1	5.53e-47	1	1
CTCF	3.77e-41	1	1.67e-17	3.29e-08	1	1.37e-19	1	1	1	1	1	1	1	1	1	1.22e-22	1	1	1	1	1	1	1	1	1	1	1	1	1	1	1	1	1	1	1	1	1	1	1	1	1	8.89e-20	1	1.13e-19	1	1	1	1	2.08e-09
CTCFL	2.69e-48	5.15e-08	1.16e-17	1	1	1.35e-19	1	1	1	1	1	1	1	1	1	4.43e-20	1	1	1	1	1	1	0.000157	1	1	1	1	1	0.000246	1	1	1	0.00014	4.33e-08	1	1	1	3.16e-08	1	1	1	1.63e-21	1	6.04e-21	1	1	1	5.27e-09	3.05e-09
CUX1	2.87e-09	1	1.41e-09	3.19e-13	1	1.53e-11	2.61e-09	1	1	1	1	1	2.71e-09	1	1	2.47e-10	1	1	1	1	1	1	1.89e-09	1	1	1	1	1	1	1	9.23e-44	1	4.96e-21	9.99988867182683e-321	1	1	1	1	1	1	1	6.34e-11	1	6.23e-09	1	1	1	1	1
DBP	2.48e-17	1	1.21e-29	1	1	2.06e-41	2.76e-09	1	1	1	1.97e-11	1	1	1	3.72e-13	7.12e-39	1	1	1.02e-10	5.22e-08	1	1	1	1	1	1	1	1	1	1	1	1	1	1.1e-47	1	1	1	1	1	1	1	1.16e-33	1	9.93e-33	1	1	1	1	1
DLX3	1.26e-64	1	1.44e-39	1	1	1.07e-38	1.93e-12	1	1	3.21e-14	1	1	1	1	1	5.21e-44	1	9.01e-36	1	1	1	1	1	1	1	1.45e-12	1	1	1	1	1	1	1	1.75e-09	1	1	1	1	1	1	1	4.94e-42	1	1.44e-47	1	1	1	1	1
DUX4	1	1	1	1	1	1	1	1	1	1	7.5e-11	1	1	1	2.1e-10	1	1	1	1	1	1	7.49e-15	1	1	1	1	1	1	1	1	1.2e-19	1	1.8e-11	1.7e-52	1	1	1	1	1	1	1	1	1	1	1.44e-10	1	1	1	1
E2F1	4.3e-217	1	6.01e-25	1	1	1.2e-21	0.000188	1	1	1	1	1	1	1	1	4.94e-24	1	1	1	1	1	1	7e-08	1	1	1	1	1	1.16e-18	1	1	1	1.72e-09	2.51e-14	1	1	1	1	1	7.37e-08	7.05e-08	6.35e-17	1	1.46e-25	1	1	1.02e-19	1.26e-10	1
E2F2	3.78e-28	1	1.79e-19	1	1	5.64e-24	1	1	1	1	1	1	1	1	1	1.22e-19	1	1	1	1	1	1	1	1	1	1	1	1	9.74e-09	1	1	1	1	1.99e-08	1	1	1	1	1	1	1	3.26e-10	1	1.1e-18	1	4.54e-14	1	1	1
E2F3	8.6e-174	1	1.71e-76	1	1	1.31e-76	6.07e-102	1	1	1	1	1	1	1	1	5.85e-91	1	1	1	1	1	2e-08	1	1	1	1	1	1	1.62e-11	1	6.51e-26	1	1.85e-09	3.99e-28	1	1	1	3.97e-15	1	1	2.11e-14	2.17e-60	1	3.34e-80	1	1	6.25e-24	3.91e-15	1.51e-09
E2F4	5.62e-211	1	7.64e-13	1	1	4.84e-18	1	1	1	1	1	1	6.22e-10	1	1	4.27e-15	1	1	2.63e-18	1	1	1	1.08e-11	1	1	1	1	1	5e-17	1	1	1	1.01e-14	2.77e-19	1	1	1	3.93e-08	1	1	0.000181	2.28e-10	1	4.97e-17	1	1	2.01e-17	5.27e-11	1
E2F5	1	1	4.91e-13	1	1	5.62e-10	1	1	1	1	1	1	1	1	1	1	1	1	1	1	1	1	1	1	1	1	1	1	1	1	1	1	1	1	1	1	1	1	1	1	1	0.000216	1	1	1	1	1	1	1
E2F6	3.04e-224	1	6.86e-36	1	1	6.73e-37	2.73e-104	1	1	1	1	1	1	1	1	9.48e-40	1	3.38e-08	2.27e-22	1	1	0.000169	1	1	1	1	1	1	2.05e-14	1	1	1	1.41e-09	1.39e-11	1	1	5.34e-08	1	1	1	3.65e-08	7.48e-24	1	7.15e-40	1	1	1.04e-08	5.13e-09	6.66e-10
E2F7	7.06e-173	1	1.72e-14	1	1	1.37e-23	1	1	1	1	1	1	3.01e-12	1	1	3.78e-20	1	1	1.08e-27	1	1	0.000214	4.84e-09	1	1	1	1	1	1.32e-22	1	1	1	1.55e-10	1.89e-166	1	1	1	6.03e-10	1	3.81e-08	1.2e-08	3.46e-13	1	3.21e-21	1	1	7.47e-20	2.18e-13	3.89e-08
EGR1	6.61e-145	1	8.69e-08	1	1	5.16e-10	3.82e-28	1.06e-08	0.000122	1	1	1	4.18e-08	1	1	9.26e-09	1	1	3.71e-08	1	1	3.87e-11	1	1	1	1	1	1	7.62e-15	1	1	1	1.08e-14	2.06e-213	1	1	1	4.92e-14	1	5.19e-08	6.52e-08	1.03e-38	1	1.03e-09	1	1	1.31e-09	8.05e-10	1
EGR2	2.12e-23	1	0.00013	7.68e-08	1.42e-24	1	1.53e-48	3.75e-16	2.5e-08	3.05e-16	1	1	1.04e-08	1	1	1	1	1	4.9e-08	1	1	1.96e-24	7.96e-09	1	1	1	1	1	4.03e-22	1	1	7.36e-08	6.04e-23	9.75e-185	3.66e-08	1	1	1	5.34e-12	0.000138	4.74e-08	6.46e-08	1	1	1	1	1.38e-09	3.04e-12	1.53e-08
EHF	1	1	9.82e-25	1	1	6.63e-26	1	1	1	1	1	1	1	4.6e-08	1	1.1e-25	1	1	1	3.78e-16	3.33e-22	0.000117	1	1	1	1	1	1	1	1	1	1	1	7.14e-31	1	1	1	1	1	1	1	1.3e-19	1	2.43e-22	1	1	1	0.000132	1
ELF1	6.07e-16	1	1.46e-29	1	1	1.92e-35	1.18e-09	1	1	1	1	1	1	1	1	7.5e-34	1	7.24e-12	3.51e-49	4.53e-14	1.16e-20	1	1	2.88e-08	1	1	1	1	3.43e-08	1	1	1	1	3.72e-41	1	1.72e-12	1	1	1	1	1	1.44e-13	1	5.13e-30	1	1	1.36e-14	7.36e-23	1
ELF2	6.07e-16	1	1.23e-18	1	1	4.05e-23	1.18e-09	1	1	1	1	1	1	1	1	1.05e-20	1	0.00014	2.41e-52	1	1	1	1	1	1	1	1	1	3.43e-08	1	1	1	1	4.62e-36	1	1.44e-09	1	1	1	1	1	1.44e-13	1	2.63e-17	1	1	3.65e-17	3.21e-24	1
ELF3	1	1	8.93e-28	1	1	4.16e-37	1	1	1	1	1	1	1	1	2.07e-08	1.79e-31	1	1	1	7.07e-16	5.86e-23	7.6e-08	1	1	1	1	1	1	1	1	1	1	7.83e-09	5.56e-224	1	1	1	1	1	1	1	1.5e-24	1	2.02e-30	1	1	3.37e-11	1	1
ELF5	1.02e-15	1	1.34e-36	1	1	9.47e-41	3.73e-09	1	1	1	1	1	1	1	1	1.09e-39	1	1	1	7.87e-18	1.14e-19	4.83e-09	1	1	1	1	1	1	1.34e-09	1	1	1	4.09e-08	4.65e-49	1	1.12e-10	0.000274	1	1	1	1	8.06e-28	1	1.22e-31	1	1	1	2.53e-13	6.07e-09
ELK1	0.000232	1	3.92e-34	1	1	3.95e-43	3.92e-08	1	1	1	1	1	1	1	1	3.21e-43	1	1	8.18e-13	1	1	1	1	1	1	1	1	1	1	1	2.88e-09	1	1.8e-16	2.42e-37	1	3.19e-09	1	1	1	1	1	8.5e-33	1	5.58e-40	1	1	1	1	1
ELK4	6.86e-11	1	1.28e-23	1	1	3.33e-31	1.33e-10	1	1	1	1	1	1	1	1	9.44e-30	1	1	1.15e-10	1	1	1	1	1	1	1	1	1	1	1	1.23e-08	1	1.21e-08	8.52e-22	1	1	1	1	1	1	1	6.7e-18	1	4.93e-29	1	1	4.26e-17	1.83e-19	1
EPAS1	1.65e-13	1	1.63e-09	1	1	1.27e-18	1	1	1	1	1	1	8.26e-12	1	1	1.09e-14	1	0.000157	1	1	1	1	1.61e-12	1	1	1	1	1	1	1	1	1	4.21e-25	2.04e-178	1	1	1	1.04e-11	1	1	1	1.31e-11	1	7.06e-13	1	1	5.07e-24	1	1
ERG	9.22e-16	1	1.38e-26	1	1	5.82e-33	1	1	1	1	1	1	1	0.000215	1	1.09e-31	1	4.01e-13	2.79e-35	1.36e-14	5.72e-20	1	1	1.54e-08	1	1	1	1	2.26e-08	1	1	1	1	4.26e-43	1	7.13e-11	1	1	1	1	1	6.45e-21	1	3.48e-28	1	1	1	5.12e-23	9.02e-11
ERR1	1.93e-09	1	2.7e-12	1	1	3.24e-14	1	1	1	1	1	1	1	1	1	4.94e-14	1	1	2.85e-09	1.03e-09	1	1	1	1	1	1	1	1	1	1	1	1	1	7.93e-38	1	1	1	1	1	1	1	1.06e-14	1	1.33e-11	1	1	1	1	0.000172
ERR2	8.79e-11	1	2.17e-11	1	1	5.94e-12	1	1	1	1	1	1	1	1	1	4.26e-10	1	1	1	2.75e-09	1	1	1	1	1	1	1	1	1	1	1	1	1	5.75e-15	1	1	1	2.6e-08	1	1	8.71e-09	1.85e-16	1	3.62e-11	1	1	1.14e-10	1	1
ERR3	5.33e-08	1	0.000263	1	1	4.34e-08	7.65e-13	1	1	1	1	1	1	1	1	6.36e-09	1	1	5.36e-08	1.19e-09	1	1	1	1	1	1	1	1	1	1	1	1	1	9.66e-35	1	1	1	3.21e-14	1	1	4.19e-08	3.76e-13	1	1.06e-09	1	1	4.85e-18	1	1
ESR1	2.46e-56	1	5.33e-09	1	1	7.18e-14	1	1	1	1	1	0.00021	1	1	1	4.3e-12	1	1	1	1	1	1	1	1	1	1	1	1	1	1	1	1	1	1.48e-47	1	1	1	1	1	1	1	1.58e-12	1	1.51e-12	1	1	1	1	1
ESR2	7.17e-81	1	2.73e-11	1	1	5.28e-16	1	1	1	1	1	1	1	1	1	7.36e-13	1	1	1	1	1	0.000237	1	1	1	1	1	1	1	1	1	1	1	1.16e-41	1	1	1	1	1	1	0.000173	1.65e-18	1	5.87e-15	1	1	1	1	1
ETS1	2.27e-19	1	2.07e-30	1	1	5.01e-32	0.000152	1	1	1	1	1	1	1	1	2.74e-31	1	1.32e-13	1.48e-48	1.03e-12	3.5e-19	0.000128	1	1	1	1	1	1	7.46e-09	1	1	1	5.64e-08	1.37e-149	1	9.55e-11	0.00018	1	1	1	1	3.75e-21	1	2.22e-28	1	1	8.53e-14	1.48e-25	5.54e-11
ETS2	1.09e-15	1	1.16000000100009e-311	1	1	9.99988867182683e-321	5.7e-83	1	1	1	1	1	1	3.7e-09	1	9.99988867182683e-321	1	1	4.37e-46	2.93e-12	3.01e-18	6.65e-22	3.22e-14	1.28e-10	1	5.26e-08	1	1	7.03e-11	1	1.86e-37	4.07e-10	3.57e-11	3.26e-104	1	4.61e-23	5.61e-08	1	1	1	7.7e-12	2.82e-225	1.51e-08	9.99988867182683e-321	7.62e-29	1	1.34e-12	3.04e-22	5.82e-14
ETV1	4.35e-18	1	3.99e-24	1	1	2e-26	1.06e-09	1	1	1	1	1	1	1	1	8.54e-30	1	1	1.33e-08	1	0.000197	1	1	1	1	1	1	1	2.26e-08	1	1	1	1	2.2e-185	1	9.79e-10	1.52e-09	1	1	1	1	1.66e-20	1	1.55e-25	1	1	1	9.1e-24	1
ETV2	1.21e-17	1	2.5e-26	1	1	3.81e-29	1	1	1	1	1	1	4.5e-08	1	1	5.44e-26	1	1	1	1	5.25e-23	1	1	1	1	1	1	1	1	1	1	1	1.05e-08	5.38e-189	1	3.32e-09	1	1	1	1	1	1.41e-17	1	2.35e-24	1	1	1	1.28e-19	4.3e-08
ETV4	1	1	1.54e-59	1	1	4.96e-67	2.18e-34	1	1	1	1	1	1	1	1	2.19e-64	1	1.47e-15	1.72e-12	1.42e-15	6.44e-18	1.98e-09	1	8.3e-08	1	1	1	1	1	1	1	1	1	3.17e-37	1	7.31e-11	1	1	1	1	1	1.18e-42	1	2.2e-62	5.67e-08	1	1	1.28e-10	1.31e-08
ETV5	1	1	1.54e-59	1	1	4.96e-67	2.18e-34	1	1	1	1	1	1	1	1	2.19e-64	1	1.47e-15	1.72e-12	1.42e-15	6.44e-18	1.98e-09	1	8.3e-08	1	1	1	1	1	1	1	1	1	3.17e-37	1	7.31e-11	1	1	1	1	1	1.18e-42	1	2.2e-62	5.67e-08	1	1	1.28e-10	1.31e-08
EVI1	1	1	8.9e-11	1	1	1	1.85e-17	1	1	1	1	1	1	1	1	1	1	1	1	1	1	1	1	1	1	1	1	1	1	1	1	1	1	9.44e-115	1	1	1	1	1	1	1	2.22e-12	1	1	1	1	1	1	1
EVX2	1	1	1.06e-22	1	1	3.11e-20	5.01e-13	1	1	1	3.53e-14	1	1	1	8.05e-15	4.97e-17	1	3.94e-09	1	1	1	1	1	1	1	5.01e-08	1	1	1	1	1	1	1	5.15e-119	1	1	1	1	1	1	1	1.27e-20	1	8.83e-21	1	1	1	1	1
FEV	1	1	1	1	1	1	1	1	1	1	1	1	1	1	1	1	1	1	1	1	1	1	1	1	1	1	1	1	1	1	1	1	1	1	1	1	1	1	1	1	1	1	1	1	1	1	1	1	1
FEZF1	1.63e-21	1	1.11e-29	1	1	1.12e-34	7.05e-10	1	1	1	1	1	1	1	1	8.42e-45	1	1	1	1	2.23e-15	1	1	1	1	1	1	1	1	1	1	1	1	1.93e-84	1	1	8.76e-14	1	1	0.000129	1	2.18e-24	1	1.79e-36	1	1	1.15e-11	3.13e-09	1.64e-08
FLI1	8.03e-15	1	5.02e-41	1	1	2.59e-26	6.66e-39	1	1	1	1	1	1	1	1	2.37e-26	1	9.42e-20	3.7e-12	7.46e-16	6.39e-21	5.92e-11	2.88e-11	6.72e-09	1	1	1	1	1	1	6.7e-13	1	7.01e-08	1.13e-38	1	1.73e-10	1	1	1	1	1	3.77e-30	1	5.78e-45	1	1	1	2.06e-10	1.99e-08
FOS	1.3e-68	1	9.46e-57	1	1	7.96e-79	9.24e-20	1	1	1	1.27e-11	1	1	1	2.19e-15	3.81e-67	1	5.08e-09	2.23e-14	0.000137	1	1	1	1	1	1	1	1	1	1	1	4.74e-08	3.57e-49	5.06e-279	1	7.41e-15	1.91e-11	1	1	1	1	3.37e-56	1.83e-30	3.79e-70	1	1	1	1	1
FOSB	1.79e-70	1	1.1e-72	1	1	9.92e-96	1.66e-22	1	1	1	1.03e-16	1	1	1	1.05e-16	3.27e-79	1	1	8.88e-14	3.35e-08	1	1	1	1	1	1	1	1	1	1	1	1	2.3e-35	1.24e-224	1	1.4e-11	1.67e-11	1	1	1	1	1.27e-57	1.36e-24	1.62e-83	1	1	1	1	1
FOSL1	2.04e-15	1	1.98e-14	1	1	6.91e-23	2.08e-23	9.97e-09	1	1	1	1.86e-08	1	1	0.000217	4.54e-20	1	7.19e-09	8.19e-10	1	1	1	1	1	0.000233	1	1	1	1	1	1	1.27e-11	5.28e-21	2.09e-97	1	9.85e-13	5.17e-15	1	1	1	1	3.83e-20	2.72e-26	1.58e-22	1	1	1	1	1
FOSL2	4.89e-16	1	5.7e-17	1	1	1.34e-23	1.65e-12	1	1	1	1	1	1	1	0.000217	2.38e-22	1	1.62e-10	2.35e-10	1	1	1	1	1	1	1	1	1	1	1	1	7.51e-10	2.31e-26	1.35e-143	1	4.37e-11	9.58e-13	4.86e-08	1	1	1	2.95e-23	2.11e-31	1.48e-22	1	1	1	1	1
FOXA1	1.48e-16	1	1.32e-56	1	1	1.28e-70	5.73e-09	1	1	1	1	1	1	1	1	7.58e-62	1	7.55e-08	1	1	3.39e-28	1	1	1	1	1	1	1	1	1	1	1	1	1.23e-66	1	8.57e-11	1	1	1	1	1	1.48e-51	1	1.21e-57	1	1	1	1	1
FOXA2	4.09e-15	1	1.27e-61	1	1	1.22e-73	8.44e-08	1	1	1	1	1	1	1	1	6.66e-66	1	1	0.000199	1	8.96e-29	1	1	1	1	1	1	1	1	1	1	1	1	2.98e-73	1	2.43e-08	1	6.82e-09	1	1.45e-08	1	2.57e-53	1	1.25e-62	1	1	9.6e-09	1	1
FOXA3	8.91e-17	1	1.95e-61	1	1	2.64e-69	1.47e-12	1	1	1	1	1	1	1	1	6.67e-62	1	1	1	1	2.6e-08	1	1	1	1	1	1	1	1	1	1	1	1	4.04e-65	1	5.4e-13	1	2.5e-08	1	1	1	1.11e-51	1	8.26e-56	1	1	3.67e-11	1	1
FOXC1	1	1	8.62e-14	1	1	1.02e-15	1e-10	1	1	1	1	1	1	1	1	2.94e-20	1	1	1	1	1	1	1	1	1	1	1	1	1	1	1	1	1	5.81e-18	1	0.000134	1	1	1	1	1	1.57e-17	1	9.02e-19	1	1	1	1	5.75e-08
FOXH1	6.01e-11	1	3.7e-19	1	1	6.18e-26	3.15e-56	1	1	1	1	1	1	1	1	1.04e-24	1	0.000145	1	1	4.89e-22	1	1	1	1	1	1	1	1	1	1	1	1	3.42e-19	1	3.96e-08	2.63e-17	1	1	1	1	7.2e-22	3.38e-10	1.14e-25	1.45e-11	1	8.3e-11	1	1
FOXI1	1	1	1	7e-69	1	1	1	1	1	1	1	1	1.06e-14	1	1	1	1	1	1	1	1	1	6.95e-16	1	1	1	1.64e-15	0.000123	1	1	1.21e-181	1	7.9e-51	9.99988867182683e-321	1	1	1	1	1	1	1	1	2.83e-22	1	1	1	1	1	1
FOXJ2	5.66e-16	1	1	1	1	1	1	1	1	1	1	1	1	1	4.21e-10	1	1	1	1	1	2.84e-11	1	1	1	1	1	1	1	1	1	1	1	1	3.17e-14	1	3.73e-08	1	1	1	1	1	6.05e-11	1	1	1	1	1	1	1
FOXJ3	5.48e-08	1	3.79e-11	1	1	4.3e-10	1	1	1	1	1	1	1	9.22e-10	1	7.36e-09	1	4.9e-09	1	1	1	1	1	1	1	1	1	1	1	1	1	1	1	3.89e-08	1	3.39e-10	2.78e-22	1.09e-08	1	4.56e-09	1	1.87e-10	1	1.93e-10	1	1	3.5e-11	3.77e-10	1
FOXK1	1.87e-34	1	3.24e-111	1	1	1e-134	1.3e-13	1	1	1	1	1	1	1	1	1.85e-127	1	1	1	1	7.58e-19	1	1	1	1	1.56e-10	1	1	1	1	1	1	1	4.95e-51	1	2.87e-35	4.85e-11	1	1	1	1	2.11e-107	4.15e-09	4.08e-113	0.000184	1	3.37e-14	1	1.67e-21
FOXM1	3.23e-17	1	1.59e-86	1	3.96e-08	5.38e-88	1.26e-12	1	1	1	1	1	1	1	3.68e-08	5.19e-85	1	1	1	1	1.99e-26	1	1	1	1	1	1	1	1	1	1	1	1	9.64e-55	1	3.96e-15	1	1	1	1	1	5.99e-72	1	7.93e-68	1	1	1.41e-14	1	1.03e-11
FOXO1	4.34e-35	1	1.88e-106	1	1	9.73e-128	2.35e-13	1	1	1	1	1	3.38e-08	1	1	1.25e-126	1	1	1	1	0.000217	1	1	1	1	1.98e-09	1	1	1	1	1	1	1	1.81e-97	1	1.13e-34	8.28e-17	1	1	1	1.09e-08	3.14e-114	2.38e-11	7.17e-116	1	1	1.18e-14	1	4.76e-21
FOXO3	6.43e-09	1	1.86e-68	1	1	1.11e-75	1.27e-10	1	1	1	1	1	1	1	1	1.37e-78	1	1	0.000176	1	6.2e-09	1	1	1	1	1	1	1	1	1	1	1	1	1.74e-75	1	1.38e-22	5.67e-08	1.1e-08	1	1	1	1.8e-64	1	2.15e-62	1	1	6.91e-17	1	1.46e-16
FOXO4	1	1	3.08e-36	1	1	6.94e-38	3e-36	1	1	1	1	1	1	1	8.3e-11	2.78e-39	1	1	1	1	1	1	1	1	1	1	1	1	1	1	1	1	1	1e-104	1	1	2.36e-11	1	1	1	1	1.78e-35	1	5.5e-40	1	1	8.2e-10	0.000236	1
FOXP1	3.49e-38	1	8.87e-82	1	1	6.3e-94	3.33e-13	1	1	1	1	1	1	1	1	5.28e-102	1	1	1	1	9.41e-23	2.69e-09	1	1	1	2.57e-09	1	1	6.02e-09	1	1	1	1	2.5e-48	1	2.58e-50	4.38e-12	1	1	1	2.04e-09	3.92e-84	1	3.92e-89	6.75e-12	1	1.05e-13	7.48e-08	3.48e-34
FOXP2	1.07e-35	1	1.86e-115	1	1	6.67e-135	1.98e-26	1	1	1	1	1	1	1	1	1.75e-133	1	1	1	1	4.98e-08	1	1	1	1	1	1	1	1	1	1	1	1	1.19e-60	1	2.72e-34	1.16e-09	3.4e-08	1	1	1	5.08e-92	1	1.51e-116	0.000114	1	8.16e-17	1	3.81e-19
FOXQ1	4.08e-21	1	1	1	1	1	7.52e-08	1	1	1	1	1	1	1	1	1	1	1	1	1	1	1	1	1	1	1	1	1	1	1	1	1	1	1	1	1	1	1	1	1	1	1	1	1	1	1	1	1	1
GABPA	6.07e-16	1	1.23e-18	1	1	4.05e-23	1.18e-09	1	1	1	1	1	1	1	1	1.05e-20	1	0.00014	2.41e-52	1	1	1	1	1	1	1	1	1	1	1	1	1	1	4.62e-36	1	1.44e-09	1	1	1	1	1	1.44e-13	1	2.63e-17	1	1	3.65e-17	3.21e-24	1
GATA1	1.34e-08	1	8.82e-12	1	1	1.17e-08	1.45e-17	1	1	1	1	1	0.000152	1	1	1	1	1	1	1	2.68e-37	1	1	1	1	1	1	1	1	1	1	1	1	6.65e-163	1	1	1	4.11e-11	1	1	7.7e-08	0.000218	1	1	1	1	2.55e-26	1	2.23e-10
GATA2	1.34e-08	1	8.82e-12	1	1	1.17e-08	1.45e-17	1	1	1	1	1	0.000152	1	3.71e-12	1	1	1	1	1	1	1	1	1	1	1	1	1	1	1	1	1	1	6.65e-163	1	1	1	4.11e-11	1	1	7.7e-08	0.000218	1	1	1	1	1.88e-25	1	2.23e-10
GATA3	1	1	1	0.000259	1	2.54e-09	2.03e-33	1	1	1	1	1	1	1	1	0.000194	1	1	6.66e-12	1	1	1	1	1	1	1.85e-13	1	1	1	1	1	1	1	4.2e-114	1	4.77e-42	3.89e-10	1.17e-08	1	1	1	2.49e-08	1	6.41e-08	1	1	3.23e-19	1	7.62e-29
GATA4	1.34e-08	1	8.82e-12	1	1	1.17e-08	1.45e-17	1	1	1	1	1	1	1	1	1	1	1	1	1	1	1	1	1	1	1	1	1	1	1	1	1	1	6.65e-163	1	1	1	4.11e-11	1	1	7.7e-08	0.000218	1	1	1	1	2.03e-26	1	2.23e-10
GATA6	1	1	3.04e-10	1	1	3.03e-08	6.37e-08	1	1	1	1	1	1	1	1	1	1	1	1	1	1	1	1	1	1	1	1	1	1	1	1	1	0.000272	2.52e-165	1	1	1	1	1	1	1	2.35e-09	1	1	1	1	1	1	1
GCR	1	1	1.16e-16	1	1	9.76e-18	0.000272	1	1	1	1	1	1	1	1	1.54e-19	1	1	1	1	1	1	1	1	1	1	1	1	1	1	1	1	1	1.04e-104	1	1	1	1	1	1	1	2.24e-15	1	7.52e-21	1	1	1	1	1
GFI1	1.85e-19	1	5.01e-12	1.6e-09	1	6.49e-16	4.76e-19	1	1	1	1	2.7e-09	7.78e-14	1	1	9.11e-18	1	2.5e-107	1	1	7.46e-19	0.000273	2.38e-10	1	1	3.2e-17	1	1	1	1	7.04e-32	1	8.77e-19	3.32e-216	1	1	1	6.54e-46	1	1	4.07e-24	9.26e-12	7.38e-14	2.86e-13	3.31e-12	1	3.04e-40	1	1.24e-16
GFI1B	1.73e-22	1	2.53e-09	7.74e-11	1	9.77e-12	6.4e-12	1	1	1	1	1	2.23e-08	1	1	2.25e-09	1	3.62e-18	1	1	1.57e-09	1	1	1	1	1	1	1	1	1	5.49e-34	1	7.62e-17	2.03e-79	1	1	1	1.19e-24	1	0.000247	4.01e-14	7.67e-11	1	1	1	1	4.07e-20	1	5.13e-16
GLI3	1	1	9.51e-24	1	1	1.55e-28	7.31e-08	1	1	1	1	1	1	1	1	3.26e-21	1	1	1.83e-08	1	1	1	1	1	1	1	1	1	1	1	1	1	1.15e-08	1.18e-232	1	1	1	1.36e-09	1	1	4.84e-10	7.38e-15	1	4.75e-23	1	1	8.74e-16	1	1
GRHL2	1	1	1.88e-16	1	1	8.38e-18	2.17e-11	1	1	1	1	1	1	1	1	5.15e-17	1	1	1	1	1	1	2.9e-08	1	1	1	1	1	1	1	1	1	5.37e-10	6.91e-28	1	1	1	1	1	1	1	2e-15	1	2.83e-19	1	1	1	1	8.49e-09
HEN1	1	1	1.48e-09	1	1	9.39e-10	1	1	1	1	1	1	1	1	1	1.02e-08	1	1	1	1	1	1	1	1	1	1	1	1	1	1	1	1	1	6.55e-18	1	1	1	1	1	1	1	0.000139	1	3.34e-08	1	1	1	1	1
HIC1	1.89e-63	1	3.54e-18	1	1	4.62e-25	1	1	1	1	1	1	1	1	1	4.57e-26	1	1	1	1	1	1	1	1	1	1	1	1	1	1	1	1	1	2.05e-123	1	1	1	7e-16	1	1	1	2.57e-26	1	3.36e-26	1	1	1	1	1
HIF1A	1.65e-13	1	1.37e-13	1	3.17e-08	7.71e-32	1	1	1	1	1	1	1.28e-08	1	7.42e-12	3.03e-24	1	1	1	8.28e-08	1	1	1.61e-12	1	1	1	1	1	1	1	1	1	4.21e-25	2.04e-178	1	1	1	1.24e-18	1	1	1	2e-15	1	6.08e-26	1	1	5.52e-18	1	1
HINFP	6.13e-41	1	1	1	1	1	1	1	1	0.000129	1	1	1	1	1	1	1	1	1	1	1	1	1	1	1	1	1	1	1	1	1	1	1	2.47e-09	1	1	1	2.01e-15	1	1	6.8e-13	1	1	1	1	1	2.67e-23	1	1
HLF	1.43e-18	1	8.3e-25	1	1	5.65e-34	1	1	1	1	1	1	1	1	1	2.9e-36	1	1	7.2e-08	1	1	1	1	1	1	1	1	1	1	1	1	1	1	1	1	1	1	1	1	1	1	6.14e-30	1	1.62e-31	1	1	1	1	1
HNF1A	1	1	9.57e-11	0.000121	1	1	1.72e-12	1	1	1	1	1	1	1	1	3.58e-08	1	0.000195	1	1	2.13e-08	1	1	1	1	1	2.06e-09	1	1	1	1	1	1	1	1	1	1	1	1	1	1	2.31e-08	1	1	1	1	1	1	1
HNF1B	1	1	9.3e-09	1	1	1	0.000231	1	1	1	1	1	1	1	1	1	1	1	1	1	0.000206	1	1	1	1	1	1	1	1	1	1	1	1	1	1	1	1	1	1	1	1	1	1	1	1	1	1	1	1
HNF4A	8.53e-16	1	2.08e-09	1	1	2.76e-09	3.05e-12	1	1	1	1	1	0.000127	1	1	4.64e-11	1	1	1	1	1	1	1	1	1	1	1	1	1	1	1	1	1	1.38e-08	1	1	1	9.8e-14	1	1	1	4.7e-15	1	5.95e-12	1	1	2.83e-13	1	1
HNF4G	1	1	2.25e-13	1	1	5.06e-11	2.65e-32	1	1	1	1	1	1	1	1	1.23e-12	1	1	1	1	1	1	1	1	1	1	1	1	1	1	1	1	1	1.23e-12	1	1	1	3.27e-10	1	1	1	4.07e-26	1	3.12e-12	1	1	1.02e-12	1	1
HNF6	1.78e-08	1	1	1	1	1	1	1	1	1	1	1	1	1	1	1	1	1	1	1	1	1	1	1	1	1	1	1	1	1	1	1	1	1.18e-11	1	1	1	1	1	1	1	1	1	1	1	1	1	1	1
HSF1	7.49e-48	1	2.24e-37	1	1	1.79e-08	1	1	1	1	1	1	1	1	1	1	1	1	1	1	1	2.77e-21	8.72e-08	1	1	1	1	1	1	1	1	1	1	5.28e-13	1	1	1	1	1	1	1	4.13e-32	1	1	9.78e-19	1	1	1	1
HSF2	1.19e-41	1	2.54e-20	1	1	1.22e-13	1	4.52e-09	1	1	1	1	1	1	1	4.29e-19	1	1	1	1	1.86e-17	1	1	1	1	1	1	1	1	1	1	1	0.00027	5.11e-17	1	1	1	5.99e-10	1	1	1.3e-09	6.92e-19	1	2.34e-16	2.42e-08	1	6.9e-18	1	1
HTF4	1.99e-15	1	6.7e-63	1	1	2.35e-72	4.34e-31	7.9e-13	1	1	1	1	1	1	1	4.83e-80	1	1.91e-09	1	2.59e-08	1	1	0.000144	1	1	1	1	1	1	1	1	5.78e-08	1.97e-24	9.99988867182683e-321	1	1	1	1	1	0.000152	1	9.99988867182683e-321	1	4.19e-67	1	1	1	1	7.24e-10
HXA1	1.18e-22	1	1	1	1	1	1	1	1	1	1	1	1	1	1	1	1	1	1	1	1	1	1	1	1	1	1	1	1	1	1	1	1	1.91e-10	1	1	1	1	1	1	1	1	1	1	1	1	1	1	1
HXA10	1	1	3.14e-10	1	1	2.33e-15	2.29e-21	1	3.09e-10	1	6.1e-14	1	1	1	1.85e-15	4.56e-12	1	5.36e-09	1	1	4.12e-34	1	1	1	1	6.92e-08	1	1	1	1	1	1	1	5.29e-200	1	5.47e-10	1	1	1	1	1	6.27e-13	1	4.63e-13	1	1	0.000243	5.22e-08	0.00026
HXA13	1	1	3.43e-10	1	1	1	1.46e-12	1	1	1	1	1	1	1	1	4.82e-09	1	0.000251	1	1	3.89e-28	1	1	1	1	1	1	1	1	1	1	1	1.96e-10	9.99988867182683e-321	1	5.06e-09	1	1	1	1	1	3.63e-14	1	7.26e-08	1	1	3.74e-09	1	4.87e-11
HXA9	1.13e-08	1	1	1	1	0.000173	2.79e-14	1	1	1	1	1	1	1	1	5.88e-08	1	1	1	1	0.000248	1	1	1	1	1	1	1	1	1	2.51e-11	1	6.29e-12	5.14e-256	1	1	1	1	1	1	1	2.65e-08	1	0.000184	1	1	1	1	1
HXB13	1	1	6.03e-10	1	1	5.97e-10	2.83e-21	1	1	1	5.79e-16	1	1	1	1.42e-21	2.89e-08	1	3.29e-08	1	2.59e-11	1.26e-35	1	1	1	1	6.6e-11	1	1	1.81e-09	1	1	1	1	8.81e-213	1	3.82e-13	1	1	1	1	1	4.5e-08	1	7.03e-09	1	1	1.58e-08	1	1
HXB4	7.08e-12	1	5.59e-95	1	1	8e-63	1.19e-12	1	1	1	1	1	1	1	1	3.76e-64	1	1	1	1.3e-14	1	1	1	1	1	1	1	1	1	1	1	1	1	2.35e-08	1	1.59e-08	1.61e-11	1	1	1	1	1.99e-89	1.44e-73	5.56e-68	1	1	5.72e-08	1	1.41e-09
HXB7	1	1	1	1	1	1	1	1	1	1	1	1	1	1	1	1	1	1	1	1	1	1	1	1	1	1	1	1	1	1	1	1	1	4.4e-11	1	1	1	1	1	1	1	1	1	1	1	1	1	1	1
HXB8	1	1	1	1	1	1	1	1	1	1	1	1	1	1	1	1	1	1	1	1	1	1	1	1	1	1	1	1	1	1	1	1	1	2.03e-10	1	1	1	1	1	1	1	1	1	1	1	1	1	1	1
HXC9	8.2e-09	1	2.85e-48	1	1	1.49e-26	3.47e-28	1	1	1	1	1	1	1	1	2.65e-25	1	1	1	1	1	1	1	1	1	1	1	1	1	1	0.000185	1	1	3.14e-108	1	9.11e-10	1	1	1	1	1	5.36e-40	1	5.05e-29	1	1	1	1	1
IKZF1	1.1e-66	1	4.58e-51	1	1	1.44e-94	2.19e-99	1	1	3.82e-09	1	1	1	1	1	1.37e-46	1	1	2.36e-08	1	1	1.79e-09	1	1	1	1	1	1	1	1	3.22e-52	2.53e-13	3.92e-22	3.1e-77	1	1	1.01e-08	3.65e-08	1	1.31e-11	8.77e-10	3.49e-46	1	2.06e-80	1	2.57e-09	9.97e-13	0.000119	1
INSM1	1	1	1	1	1	1	1	1	1	1	0.00012	1	1	1	1	1	1	1	1	1	1	1	1	1	1	1	1	1	1	1	1	1	1	1	1	1	1	1	1	1	1	1	1	1	1	1	1	1	1
IRF1	1.46e-48	0.000229	3.33e-10	1.3e-08	0.00018	5.9e-11	2.12e-19	1	2.35e-08	3.95e-08	1	1	1	2.18e-08	1	2.62e-09	1	2.83e-08	2.63e-09	1	7.06e-18	3.39e-14	1	1	1	1	0.000182	1	7.28e-09	1	1	1	1	5.07e-40	1	1.31e-36	9.1e-26	1	1	2.58e-09	1	4.28e-10	1	9.94e-11	5.25e-09	1	3.21e-11	1e-09	5.83e-19
IRF2	2.7e-08	1	1	1	1	1	1.43e-10	1	1	1	1	1	1	0.000157	1	1	1	1	1	1	1	2.92e-09	1	0.000204	1	1	1	1	1	1	1	1	1	1.61e-11	1	2.27e-26	2.85e-10	1	1	1	1	1	1	1	1.23e-09	1	1	1	9.45e-21
IRF3	2.17e-48	1	3.14e-20	1.52e-10	1	7.72e-25	2.9e-26	1	6.85e-08	1	1	1	1	5.04e-18	1	1.21e-29	1	1.32e-08	9.57e-16	1	3.75e-40	1.02e-36	1	1	1	1	2.28e-09	1	1.16e-10	1	1	1	1	6.09e-35	1	4.85e-62	1.71e-41	1.04e-08	1	0.000247	1.54e-08	1.2e-23	1	1.66e-31	1	1	1.28e-16	1e-09	7.58e-43
IRF4	6.91e-09	1	1.33e-17	1	1	1.26e-17	1.59e-10	1	1	1	1	1	1	1	1	2.06e-19	1	1	6.38e-14	1	2.64e-08	2.38e-09	1	1	1	1	1	1	1	1	1	0.00015	1	7.6e-31	1	4.34e-17	6.46e-10	1	1	1	1	1.43e-17	1	3.22e-23	1	1	7.44e-08	1	8.08e-09
IRF7	3.96e-14	0.000275	1	3.59e-10	1	1	1.4e-12	1	1	1	1	1	1	5.4e-12	1	1.64e-09	1	1	1	1	6.55e-23	1	1	1	1	0.000121	1	1	1	1	1	1	1	3.49e-08	1	2.23e-23	8.33e-12	1	1	2.97e-11	1	1	6.47e-09	1	1	1	1.15e-11	7.13e-09	7.88e-12
IRF8	1	1	5.65e-16	1	1	8.6e-16	3.76e-10	1	1	1	1	1	1	1	1	7.4e-18	1	1	6.32e-15	1	8.8e-14	8.57e-08	1	1	1	1	1	1	1	1	1	1	1	9.86e-25	1	6.71e-16	4.8e-10	1	1	1	1	1.67e-14	1	1.05e-18	2.65e-08	1	1	1	2.75e-08
IRF9	1.54e-14	1	3.78e-10	1	1	4.8e-10	1	1	1	1	1	1	1	1	1	1.82e-13	1	1	1	1	0.000183	1	1	1	1	1	1	1	1	1	1	1	1	1	1	1	1	1	1	1	1	4.46e-09	1	1.88e-12	1	1	1	1	1
ISL1	7.93e-66	1	1.16e-55	2.73e-09	1	8.99e-61	1.09e-20	1	1	1	5.51e-20	1	0.000191	1	8.79e-17	1.86e-62	1	3.77e-08	1	2.95e-13	1	1	1	1	1	1	1	1	1	1	1	7.15e-08	4.43e-11	9.99988867182683e-321	1	2.91e-08	7.23e-09	1	1	1	1	9.33e-41	2.85e-18	1.76e-62	2.71e-09	1	1	1	1
ITF2	6.64e-19	1	1.11e-47	1	1	7.2e-47	4.22e-13	3.57e-08	1	1	1	1	1	1	1	3.89e-56	1	1	1	4.64e-09	1	1	1.08e-11	1	1	1	1	1	1	1	1	5.03e-08	0.00016	9.99988867182683e-321	1	1.32e-08	1	1	1	1	1	9.99988867182683e-321	8.19e-08	7.14e-48	1	1	1	1	2.91e-10
JUN	1.13e-56	1	3.98e-42	1	1	1.86e-54	9.68e-23	1	1	1	6.76e-12	1	1	1	2.01e-15	2.11e-46	1	1	1.8e-10	1	1	1	1	1	1	1	1	1	1	1	1	8.12e-08	2.58e-32	5.59e-166	1	1.28e-15	6.34e-11	1	1	1	1	6.79e-40	1.57e-38	4.7e-52	1	1	1	1	0.000152
JUNB	6.5e-59	1	2.04e-46	1	1	2.75e-62	7.17e-22	1	1	1	6.86e-14	1	1	1	9.01e-18	4.37e-51	1	1	1.15e-13	1	1	1	1	1	1	1	1	1	1	1	1	2.83e-08	2.8e-30	8.33e-148	1	4.04e-16	4.33e-11	1	1	1	1	5.93e-37	2.16e-34	2.74e-58	1	1	1	1	1
JUND	8.03e-66	1	1.65e-65	1	0.00014	6.2e-91	1.89e-21	1	1	1	2.04e-11	1	1	1	1.67e-14	1.76e-72	1	0.00027	2.91e-14	1	1	1	1	1	1	1	1	1	1	1	1	1	2.96e-39	8.05e-229	1	4.04e-13	1.65e-11	1	1	1	1	7.84e-60	5.52e-31	5.5e-78	1	1	1	1	1
KAISO	5.12e-29	1	7.03e-17	1	1	4.56e-18	1	1	1	1	1.14e-12	1	1	1	3.24e-15	9.46e-20	1	1	1	1	1	4.36e-08	4.23e-10	1	1	1	1	1	1	1	1	1	3.7e-11	2e-10	1	1	1	6.7e-20	1	1	3.15e-14	1.12e-38	1	9.26e-20	1	0.000132	3.15e-37	1	1
KLF1	1.81e-36	1	1	1	1	7.14e-10	1	1	1	1	1	1	0.000142	1	1	1	1	1	4.17e-15	1	1	7.6e-08	6.23e-12	1	1	1	1	1	3.56e-18	1	1	1	5.29e-16	1.16e-249	1	1	1	1	1	1	1.86e-08	0.000235	1	0.000128	1	1	1	1.7e-12	1
KLF12	5.58e-13	1	1.82e-13	1	1	1.63e-13	1	1	1	1	1	1	7.08e-08	1	1	2.86e-12	1	1	2.75e-13	1	1	1	2.97e-12	1	1	1	1	1	6.19e-22	1	1	1	3.5e-17	6.21e-242	1	1	1	1	1	0.000223	2.43e-09	1.43e-09	1	3.53e-11	1	1	1	1.61e-10	1
KLF15	2.64e-46	1	1	1	1	1	1	1	3.27e-09	1	1	1	1	1	1	1	1	1	9.93e-11	1	1	2.47e-09	1	1	1	1	1	1	2.53e-41	1	1	1	2.95e-10	3.33e-126	1	1	1	1	1	0.000217	1	1	1	1	4.6e-11	1	1.42e-08	9.75e-17	0.000197
KLF3	1.36e-25	1	2.8e-08	1	1	2.46e-08	1	1	1	6.04e-08	1	1	0.000191	0.0002	1	1	1	1	1.24e-19	1	1	2.48e-08	2.46e-13	1	1	1	1	1	1.58e-20	1	1	1	2.86e-14	1.55e-223	1	1	1	1	1	1	6.3e-08	0.000235	1	1.9e-09	1	1	8.89e-16	4.02e-15	1
KLF4	8.44e-28	1	1	1	1	1.14e-08	1	1	1	1	1	1	2.31e-09	1	1	1	1	1	7.52e-14	1	1	1	2.99e-13	1	1	1	1	1	2.51e-16	1	2.12e-10	1	4.05e-17	2.9e-216	1	1	1	1	1	1	1.17e-08	1.26e-09	1	5.37e-11	1	1	1.09e-10	4.29e-10	1
KLF5	8.56e-35	1	4.29e-13	1	1	6.55e-17	3.66e-11	1	1	1	1	1	1	1	1	3.69e-12	1	1	4.79e-13	1	1	6.32e-09	6.11e-11	1	1	1	1	1	7.81e-18	1	5.5e-17	1	1.58e-17	4.89e-217	1	1	1	1	1	6.25e-08	0.000169	2.1e-14	1	2.86e-15	1	1	7.32e-13	1.14e-09	1
KLF6	1.21e-111	1	2.88e-17	1	1	2.46e-23	1	1	1	1.23e-08	1	1	1	1	1	2.34e-16	1	1	4.9e-16	1	1	3.27e-10	2.36e-09	1	1	1	1	1	8.73e-26	1	1	1	8.87e-14	1.82e-197	1	1	1	1	1	1	1	9.15e-15	1	8.54e-19	2.42e-10	1	2.96e-14	1.25e-15	1
KLF8	6.38e-15	1	0.000161	1	1	1.3e-12	5.35e-08	1	1	1	1	1	1	1	1	3.37e-12	2.9e-09	1	1	1	1	6.75e-08	1	1	1	1	1	1	1	1	1	1	2.68e-08	1	1	1	1	1.5e-10	1	1	1	2.75e-15	1	2.7e-14	1	1	3.19e-14	2.48e-08	1
KLF9	3.29e-09	1	1	1	1	5.74e-09	1	1	1	1	1	1	8.47e-10	1	1	0.000238	1	1	1	1	1	1	3.33e-14	1	1	1	1	1	2.55e-12	1	1	1	2.44e-22	6.47e-259	1	1	0.000125	1	1	1.87e-08	1	1	1	5.64e-11	1	1	1	1.56e-10	1
LEF1	1	1	1	1	1	1	1	3.65e-21	1	1	1	1	1	2.03e-08	4.47e-09	1	1	1	1	1.16e-08	2.67e-30	1	1	1	1	1	1	1	1	0.000149	1	1	1	1	1	1	1	1	1	1	1	1	1	1	1	1	4.67e-16	2.08e-09	1
LHX2	1.26e-64	1	1.75e-63	1	1	5.16e-65	1.93e-12	1	1	1.27e-09	1	1	1	1	1	9.69e-77	1	1.27e-24	1	1	1	1	1	1	1	1.45e-12	1	1	1	1	1	1	1	5.14e-09	1	0.000259	1	1	1	1	1	5.86e-68	7.02e-46	1.12e-84	1	1	1	1	1
LHX3	1	1	1	1	1	1	1	1	1	1	1	1	1	1	1	1	1	1	1	1	1	1	1	1	1	1	1	1	2.84e-08	1	1	1	1	6.09e-17	1	1	1	1	1	1	1	1	1	1	1	1	1	1	1
MAF	2.41e-57	1	8.84e-30	1	1	7.61e-34	1.14e-14	1	1	1	1	1	1	1	1	4.66e-39	1	1	1	1	3.58e-35	1	1	1	1	1	1	1	1	1	2.2e-11	1	0.000216	1.49e-164	1	1	1	3.98e-12	1	0.00018	1	2.86e-25	1.84e-86	1.4e-39	2.19e-11	1	5.9e-08	1	1
MAFB	8.91e-90	1	4.4e-24	1	0.000207	5.81e-38	4.15e-17	1	1	1	1.93e-13	1	1	1	2.07e-12	4.1e-33	1	3e-08	1	1	7.96e-35	1	1	1	1	1	1	1	1	1	6.03e-09	1	0.000148	9.87e-163	1	1	1	7.05e-12	1	1	1	3.08e-102	7.97e-92	1.44e-42	1	1	0.00021	1	1
MAFF	5.97e-87	1	4.79e-49	1	1	3.9e-58	2.57e-35	1	1	1	1	1	1	1	1	2.12e-58	1	1.52e-08	1	1	6.12e-23	1	1	1	1	1	1	1	1	1	1	1	1	1.5e-133	1	1	5.77e-09	1	1	1	1	5.97e-45	2.02e-26	3.93e-64	1	1	1	1	1
MAFG	2.58e-13	1	9.89e-10	1	1	5.53e-14	9.25e-17	1	1	1	1	1	1	1	1	4.11e-13	1	1	1	1	1	1	1	1	1	1	1	1	1	1	1	1	1	2.73e-29	1	1	1	1	1	1	1	2.55e-08	4.37e-26	2.44e-14	1	1	1	1	1
MAFK	2.37e-10	1	2.77e-25	1	1	1.88e-31	3.71e-36	1	1	1	1	1	1	1	1	8.81e-32	1	1.16e-09	1	1	1	1	1	1	5e-08	1	1	1	1	1	1	1	1	7.25e-215	1	1	4.43e-09	1	1	1	1	7.1e-22	7.56e-37	2.28e-35	1	1	1	1	1
MAX	8.74e-19	1	2.76e-34	6.51e-08	1.1e-08	1.72e-31	4.26e-15	1	1	5.11e-11	6.91e-12	1	6.24e-09	1	3.76e-14	1.14e-32	1	1	1	1	1	1	1.13e-20	1	1	1	1	1	1	1	1.79e-09	1	2.54e-178	9.99988867182683e-321	1	1	1	6.67e-15	1	1	1.4e-12	3.21e-27	6.72e-10	1.23e-39	1	1	7.88e-31	1	1
MAZ	2.58e-92	1	2.73e-08	1	1	2.1e-09	6.5e-29	1	3.69e-18	1	1	1	0.000172	1	1	1	1	1	1.82e-11	1	1	4.29e-17	0.000131	1	1	1	1	1	4.28e-38	1	1	1	1.85e-11	2.27e-143	1	2.76e-10	1.12e-11	1	1	9.75e-12	1.96e-08	7.82e-11	1	1.29e-08	6.16e-09	1	1	3.16e-22	6.15e-12
MBD2	1	1	1.33e-25	1	1	5.91e-21	2.45e-12	1	1	1	1	1	1	1	1	2.04e-32	1	1	1	1	1	1	1	1	1	1	1	1	1.57e-11	1	1	1	2.1e-09	1.77e-18	1.44e-08	1	1	8.47e-09	1	1	1.01e-15	7.52e-15	1	1.04e-17	1	4.02e-09	3.56e-19	1.95e-08	1
MECP2	2.21e-37	1	1.61e-29	5.35e-09	1	7.23e-15	3.48e-11	1	1	1	1	1	1	1	1	8.1e-14	1	1	0.000155	1	1	1	1	1	1	1	1	1	4.84e-08	1	1	1	3.46e-08	6.52e-09	1	1	1	1.04e-20	1	1	5.34e-18	2.82e-14	1	1.31e-12	1	1	1.09e-39	1.09e-09	1
MEF2A	4.62e-49	1	2.96e-09	0.000139	1	1.06e-14	1	1	1	1	1	1	1	1	1	1.95e-12	1	1	1	1	1	1	1	1	1	1	1	1	1	1	1	1	1	3.77e-48	1	2.33e-13	4.33e-11	1	1	3.46e-08	1	1.15e-12	1	3.41e-14	1	1	1	1	1
MEF2B	3.04e-47	1	1.49e-10	1.88e-08	1	8.62e-17	1	1	1	0.000166	1	1	1	1	1	6.73e-15	1	0.000194	1	1	1	1	1	1	1	1	0.000183	1	1.97e-08	1	1	1	1	1.32e-65	1	1.33e-21	7.38e-11	1	1	6.99e-08	1	7.31e-17	1	7.82e-17	1	1	1	8.32e-09	1
MEF2C	3.67e-33	1	1.4e-09	1	1	3.51e-14	1	1	1	1	1	1	1	1	1	5.64e-16	1	1	1	1	1	1	1	1	1	1	1	1	0.000134	1	1	1	1	3.42e-51	1	3.93e-13	1.41e-09	1	1	0.000196	1	2.53e-11	1	1.72e-15	1	1	1	1	1
MEF2D	1.51e-29	1	9.09e-16	1	1	4.12e-18	5.45e-15	1	1	1	1	1	1	1	1	2.05e-16	1	1	1	1	1	1	1	1	1	1	1	1	1	1	1	1	1	2.85e-11	1	1	1	1	1	1	1	1.08e-22	1	5.89e-18	1	1	1	1.77e-08	1
MEIS1	6.7e-11	1	1	1	1	1	4.56e-13	1	1	1	1	1	3.13e-11	1	1	1	1	1	1	1	1	1	1	1	1	1	1	1	1	1	1	1	1.47e-10	9.18e-112	1	1	1	1	1	1	1	2.12e-08	1	7.05e-09	1	1	1	1	1
MEIS2	1	1	1	1	1	8.46e-14	1.21e-09	1	1	1	1	1	1	1	1	8.55e-11	1	1	3.15e-14	1	1	1	1	1	1	1	1	1	1	1	1	1	1	3.26e-32	1	1	1	5.48e-08	1	1	1.53e-12	1.41e-08	4.77e-11	3.33e-09	1	1	2.52e-08	1	1
MITF	6.63e-08	1	4.12e-27	1	1	7.36e-16	1	1	1	1	5.08e-10	1	2.38e-12	1	1	5e-12	1	1	1	1	1	1	8.45e-27	1	1	1	1	1	1	1	0.0002	1	3.45e-176	9.99988867182683e-321	1	1	1	1.45e-08	1	1	2.75e-11	8.98e-29	1	5.35e-13	1	1	2.09e-09	1	1
MTF1	5.03e-254	1	1.35e-24	1	1	1.26e-29	1	1	1	7.97e-11	1	1	1	1.03e-12	1	5.48e-32	1	1	1	1	1.17e-33	1	1	1	1	1	1	1	1	1	1	1	1	1	1	1	1	1	1	1	1	9.66e-20	1	6.46e-29	1	1	1	1	1
MXI1	1.32e-15	1	2.76e-34	6.51e-08	0.000183	1.72e-31	1.03e-14	1	1	5.11e-11	5.91e-11	1	6.75e-10	1	3.18e-11	1.14e-32	1	1	1	1	1	1	3.06e-20	1	1	1	1	1	1	1	3.19e-10	1	4.73e-169	9.99988867182683e-321	1	1	1	5.58e-17	1	1	1.4e-12	8.81e-33	2.52e-08	9.83e-41	1	1	7.88e-31	1	1
MYB	1.13e-23	1	3.25e-166	1	1	3.39e-186	3.27e-16	1	1	1	1	3.88e-09	0.000137	1	1	2.33e-222	1	5.11e-33	1	4.25e-13	3.9e-15	1	1	1	1	1	1	1	1	1	1	1	1.54e-10	8.65e-80	1	1	6.74e-09	1	1	1	1	9.77e-134	1.69e-25	3.06e-198	1	1	1	1	1.4e-45
MYC	1	1	2.62e-33	1.01e-08	1	7.13e-32	0.000239	1	1	0.000144	1	1	8.8e-17	1	1	8.06e-36	1	1	1	1	1	1	9.18e-29	1	1	1	1	1	1	1	1	1	1.92e-104	9.99988867182683e-321	1	1	1	0.000166	1	1	1.04e-08	1.66e-19	1	3.23e-42	1	0.000198	7.02e-10	1	1
MYCN	4.77e-09	1	4.66e-34	1.66e-10	9.72e-09	3.4e-36	3.64e-13	1	1	8.36e-13	2.82e-14	1	6.2e-11	1	3.01e-17	4.4e-35	1	1	1	1	1	1	1.31e-21	1	1	1	1	1	1	1	1	1	8.71e-187	9.99988867182683e-321	1	1	1	1.73e-18	1	1	2.54e-13	1.48e-23	1.19e-14	4.97e-43	1	1	7.43e-34	1	1
MYF6	2.47e-18	1	4.21e-21	1	1	2.88e-29	1	1	1	1	1	1	1	1	1	3.35e-27	1	1	1	3.05e-09	1	1	1	1	1	1	1	1	1	1	3.31e-08	1	1	3.62e-23	1	1	1	1	1	1	1	9.07e-16	1	2.27e-25	1	1	1	1	1
MYOD1	1.33e-20	1	3.13e-19	1	1	4.54e-25	1	1	1	1	1	1	1	1	1	8.1e-23	1	1	1	1.99e-11	1	1	1	1	1	1	1	1	1	1	1	1	1	5.86e-30	1	1	1	1	1	1	1	2.99e-13	1	7.84e-22	1	1	1	1	1
MYOG	1	1	2.71e-16	1	1	1.47e-17	0.000128	1	1	1	1	1	1	1	1	8.38e-18	1	1	1	6.02e-08	1	1	1	1	1	1	1	1	1	1	1	1	1	1.08e-26	1	1	1	1	1	1	1	2.01e-12	3.73e-08	3.26e-15	1	1	1	1	1
MZF1	1.94e-19	1	9.27e-45	1	1	1.9e-58	1.91e-31	1	1	1	1	1	1	6.22e-08	1	3.69e-52	1	2.98e-11	2.38e-09	2.69e-08	1	1.85e-19	1	1	1	1	1	1	3.68e-20	1	3.82e-17	3.12e-09	3.64e-08	8.63e-54	1	4.49e-11	1	2.03e-15	1	9.32e-11	1.06e-13	1.34e-34	1	1.34e-58	1	1	3.18e-26	3.47e-11	9.88e-14
NANOG	1.53e-08	1	1.14e-14	1	1	5.48e-17	5.01e-43	1	1	1	1	1	1	1	1	1.96e-15	1	1	1	1	1.05e-14	1	1	1	1	1	1	1	1	1	1	1	1	1	1	1	1	9.1e-13	1	1	1	5.72e-13	1	2.25e-14	1	1	1	1	0.000115
NDF1	0.000179	1	5.04e-17	1	1	7.29e-19	1.26e-13	6.13e-09	1	1	1	1	1	1	1	2.45e-23	1	1	1	1.45e-11	1	1	1	1	1	1	1	1	1	1	1	1	1	4.74e-57	1	1	1	1	1	1	1	1.4e-15	4.35e-08	2.02e-19	1	1	1	1	1
NDF2	1	1	3.89e-26	1	1	1.88e-31	3.85e-10	2.9e-08	1	1	1	1	1	1	1	2.78e-32	1	1	1	1.27e-09	2.95e-19	1	6.27e-13	1	1	1	1	1	1	1	1	1	1.18e-26	9.99988867182683e-321	1	0.000217	1	1	1	1	1	2.54e-40	1.82e-08	7.96e-33	1	1	0.000273	1	1
NF2L1	5.93e-13	1	3.41e-129	1	1	7.07e-79	3.76e-08	1	1	1	1	1	1	1	2.31e-11	1.23e-61	1	1	1	6.83e-09	1	1	1	1	1	1	1	1	1	1	1	1	1.54e-21	4.4e-130	1	1.08e-16	7.62e-10	1.35e-09	1	1	1.85e-11	1.24e-117	4.34e-168	2.25e-79	1	1	3.72e-17	1	1
NF2L2	4.76e-50	1	2.18e-28	1	1	4.6e-32	1	1	1	1	1	1	1	1	1	2.15e-23	1	1.28e-12	1	1	1	1	1	1	1	1	1	1	1	1	1	1	4.32e-11	4.61e-42	1	6.89e-09	8.46e-14	1	1	1	1	3.41e-23	3.73e-23	1.02e-24	1	1	1	1	1
NFAC1	4.61e-09	1	5.35e-57	1	1	2.69e-62	1.62e-64	1	1	1	1	1	1	1	1	1.25e-62	1	1	4.41e-20	1.51e-14	9.56e-27	1	2.17e-09	3e-08	1	3.82e-08	1	1	1	1	3.44e-57	5.78e-10	2.76e-15	1.04e-54	1	3.42e-24	1	1	1	1	1	3.68e-39	1	4.59e-63	4.74e-08	1	1.69e-14	1	1.28e-15
NFAC2	4.31e-09	1	8.32e-57	1	1	3.5e-62	2.15e-64	1	1	1	1	1	1	1	1	1.6e-62	1	1	1.41e-12	1.63e-14	1.07e-26	1	2.15e-09	3.03e-08	1	3.78e-08	1	1	1	1	4.3e-57	5.82e-10	2.87e-15	1.27e-54	1	3.49e-24	1	1	1	1	1	4.88e-39	1	6.6e-63	4.93e-08	1	1.83e-14	1	1.35e-15
NFAC3	2.45e-30	1	2.47e-39	1	1	2.47e-44	6.04e-87	1	1	1	1	1	1	5.52e-08	1	1.17e-42	1	1	1	8.26e-11	3.61e-25	3e-08	0.000171	1	1	1	1	1	6.33e-11	1	1.08e-55	0.000128	5.14e-15	1.13e-90	1	3.63e-24	1	1	1	1	1	2.18e-26	1	6.93e-48	3.79e-08	1	4.68e-13	1	2.9e-13
NFAC4	4.61e-09	1	5.35e-57	1	1	2.69e-62	1.62e-64	1	1	1	1	1	1	1	1	1.25e-62	1	1	4.41e-20	1.51e-14	9.56e-27	1	2.17e-09	3e-08	1	3.82e-08	1	1	1	1	3.44e-57	5.78e-10	2.76e-15	1.04e-54	1	3.42e-24	1	1	1	1	1	3.68e-39	1	4.59e-63	4.74e-08	1	1.69e-14	1	1.28e-15
NFE2	1.44e-73	1	1.11e-42	1	1	8.56e-48	9.89e-28	1	1	1	1	1	1	1	1	3.86e-47	1	6.92e-09	3.21e-08	1	3.67e-22	1	1	1	1	1	1	1	1	1	1	1	8.55e-09	5.38e-46	1	7.67e-08	3.76e-15	1	1	1	1	6.38e-50	7.82e-23	5.95e-47	1	1	1	1	1
NFIA	4.69e-61	1	1.81e-19	1	1	3.62e-18	4.14e-28	1	1	1	1	1	1	1	1	1.25e-26	1	1	3.82e-15	1	1	1	1	1	1	1	1	1	1	1	1.45e-12	1	1	2.33e-27	1	1	1	1.91e-19	1	1	2.04e-13	3.96e-17	2.98e-08	3.83e-16	1	1	3.62e-24	1	1
NFIC	1.86e-12	1	1.45e-08	1	1	1.5e-08	5.92e-46	1	1	1	1	1	0.000137	1	1	6.4e-10	1	1	2.29e-08	1	1	1	1	1	1	1	1	1	1	1	1	1	1	4.25e-49	1	1	1	4.43e-16	1	1	2.75e-13	7.52e-10	1	3.05e-10	1	1	1.62e-23	1	1
NFKB1	1.45e-41	1	6.41e-88	1	1	9.56e-95	1.3e-117	1	1	1	1	1	1	1	1	2.92e-107	1	1	1	1	8.8e-09	2.57e-18	7.79e-24	1	1	1	1	1	1.79e-12	1	2.01e-51	2.44e-09	5.79e-15	1.23e-64	1	2.05e-27	9.31e-16	2.3e-11	1	1.49e-09	7.66e-16	4.65e-71	1	8.5e-101	1	1	4.65e-14	5.65e-13	9.15e-14
NFKB2	2.85e-12	1	9.87e-22	1	1	8.52e-15	5.54e-37	2.16e-10	1	1	1	1	1	1	1	4.62e-17	1	1.39e-15	1	1	1	1	1	1	1	1	1	1	1	1	1	2.46e-12	1	2.21e-10	1	1	1	1.06e-12	1	1	0.000148	1.14e-15	1	2.69e-16	1	1	5.02e-15	1	1
NFYA	1	1	2.76e-30	5e-86	1	1.73e-43	1	1	1	1	1	1	2.77e-31	1	1	9.99e-38	3.4e-08	1	1	1	1	1	2.54e-24	1	1	1	8.47e-24	1.1e-18	1	1.35e-08	4.53e-189	1	1.19e-61	8.58000010001507e-313	1	1	1	8.77e-14	1	1	1.67e-08	6.9e-23	2.56e-23	1.51e-35	1	1	6.99e-14	7.58e-14	1
NFYB	1	1	2.76e-30	1.28e-87	1	1.73e-43	1	1	1	1	1	1	7.39e-31	1	1	9.99e-38	2.46e-08	1	1	1	1	1	4.31e-24	1	1	1	1.65e-24	1.1e-18	1	5.07e-09	1.89e-196	1	5.49e-59	8.58000010001507e-313	1	1	1	8.77e-14	1	1	1.67e-08	6.9e-23	2.56e-23	1.51e-35	1	1	6.19e-14	5.8e-15	1
NFYC	1	1	3.24e-43	6.52e-78	1	1.54e-55	0.000271	1	1	1	1	1	7.93e-30	1	1	2.12e-48	0.000148	1	1	1	1	1	1.76e-28	1	1	1	3.61e-20	5.51e-17	1	0.000137	4.65e-185	1	6.89e-57	9.99988867182683e-321	1	1	1	0.000135	1	1	0.000177	6.65e-29	2.18e-19	3e-44	1	1	5.74e-09	7.99e-10	1
NKX21	2.69e-224	1	3.93e-49	1	1	2.13e-39	2.06e-97	1	1	1	1	1	1	0.000152	1	7.89e-51	1	2.42e-10	1	1	1	1	1.12e-11	1	1	1	1	1	1	1	1	1	1.77e-10	1.87e-31	1	1	0.000188	1	1	1	1	1.58e-61	1	3.29e-48	1.29e-09	1	1	0.000242	1
NKX25	1	1	1	1	1	1	1	1	1	1	1	1	1	1	1	1	1	1	1	1	1	1	1	1	1	1	1	1	1	1	1	1	1	1	1	1	1	1	1	1	1	1	1	1	1	1	1	1	1
NKX28	6.78e-52	1	1.2e-13	1	1	1.74e-13	1	1	1	1	1	1	1	1	1	3.65e-16	1	1	1	1	1	1	1	1	1	1	1	1	1	1	1	1	1	8.03e-14	1	1	1	1	1	1	1	4.13e-14	1	1.93e-13	1	1	1	1	1
NKX31	6.78e-189	1	4.69e-45	1	1	1.67e-49	8.9e-40	1	1	1	1	1	1	1	1.02e-14	8.37e-51	1	1	6.81e-15	7.02e-17	5.53e-42	1.59e-09	1.82e-13	1	1	1	1	5.43e-11	1	1	8.9e-17	1	5.77e-20	2.72e-82	1	1	0.000216	1	1	1	1	8.35e-237	1.41e-08	3.45e-48	2.87e-10	1	1	1	7.97e-17
NKX32	2.82e-41	1	2.29e-11	1	1	1.8e-15	3.55e-26	1	1	1	1.29e-12	1	6.23e-08	1	1.01e-16	2.89e-14	1	1	1	6.69e-15	1	1	1.76e-12	1	1	1	1	1	1	1	3.08e-10	1	7.86e-20	6.91e-116	1	1	1	1	1	1	1	6.23e-52	1	1.28e-14	1	1	1	1	1
NKX61	1	1	2.48e-09	1	1	7.8e-12	1	1	0.000136	1	1.54e-19	1	1	1	4.63e-24	1.14e-12	1	1	2.99e-09	1	1	1	1	1	1	1	1	1	1	1	1	1	1	3.78e-10	0.000128	1	1	1	1	1	1	1	1	4.18e-09	2.23e-08	1	3.08e-08	0.000172	1
NOBOX	4.13e-50	1	2.65e-21	1	1	2.4e-27	1	1	1	1	1	1	1	1	1	1.94e-21	1	1	1	1	1	1	1	1	1	1	1	1	1	1	1	1	1	1	1	1	1	1	1	1	1	1.06e-25	2.38e-38	9.25e-27	1	1	1	1	1
NR1D1	3.17e-39	1	1.58e-53	1.28e-09	1	8.8e-93	1.64e-87	1	1	1	1.39e-10	1	1	1	8.49e-15	2.25e-70	1	1.15e-11	1	1	1	1	1	1	1	1	1	1	1	1	1	1	4.47e-12	1.47e-120	4.84e-14	1	1	1	1	1	1	2.4e-48	2.27e-13	1.82e-70	1	1	1.68e-10	1	1
NR1H3	1.86e-10	1	7.36e-24	1	1	2.28e-27	1	1	1	1	1	1	1	1	1	3.43e-24	1	1	1	1	1	1	1	1	1	1	1	1	1	1	1	1	1.13e-19	2.49e-81	1	1	2.38e-08	2.3e-16	1	1	1	1.79e-20	1	1.35e-27	1	1	1	1	1
NR1H4	8.23e-09	1	2.93e-11	1	1	1.24e-14	1.62e-09	1	1	1	1	1	1	1	1	2.08e-20	1	1	1	1	1	1	1	1	1	1	1	1	1	1	1	1	1	7.39e-10	1	1	1	1	1	1	1	1.48e-14	1	2.52e-16	1	1	1.31e-13	1	1
NR1I2	3.76e-23	1	1	1	1	1	0.000135	1	1	1	1	1	1	1	1	1	1	1	1	1.49e-09	2.25e-15	1	1	1	1	1	1	1	1	1	1	1	1	6.15e-17	1	1	1	6.13e-11	1	1	1	1	1	5.78e-08	1	1	1.15e-10	1	1
NR1I3	1	1	5.75e-11	1	1	8.83e-08	4.64e-16	1	1	1	1	1	1	1	1	6.26e-08	1	1	1	1	1	1	1	1	1	1	1	1	1	1	1	1	1	2.05e-33	1	1	1	1	1	1	1	2.97e-08	1	8.3e-10	1	1	1	1	1
NR2C1	1.22e-26	1	2.7e-24	1	1	1.24e-20	1.44e-11	1	1	1	1	1	1	1	1	2.23e-33	1	1	1	2.99e-08	2.44e-26	1	1	1	1	1	1	1	1	1	1	1	1	2.89e-98	1	1	1	2.82e-10	1	1	1	9.12e-30	1	9.87e-35	1	1	1	1	1
NR2C2	3.72e-16	1	5.28e-14	1	1	3.47e-26	3.13e-09	1	1	1	1	1	1	1	1	6.31e-22	1	1	1	1	1	1	1	1	1	1	1	1	1	1	1	1	1	2.75e-16	1	1	1	0.000115	1	1	1	1.48e-20	1	2.02e-22	1	1	5.34e-10	1	1
NR2E3	1.33e-21	1	1	1	1	0.000238	6.55e-14	1	1	1	1	1	1	1	1	1.63e-08	1	1	1	1	9.02e-10	1	1	1	1	1	1	1	1	1	1	1	7.45e-13	9.48e-53	1	1	1	1	1	1	1	1	1	1	1	1	1	1	1
NR4A1	8.97e-21	1	7.02e-56	1	1	8.16e-81	3.52e-45	1	1	1	1	1	1	1	1	2.16e-82	1	1	0.000158	1.78e-10	2.24e-08	1	1	1	1	1	1	1	1	1	1	1	1	1.19e-51	1	1	1	1	1	1	1	7.21e-35	2.38e-09	4.66e-69	1	1	1	1	1
NR4A2	1	1	1.52e-31	1	1	6.41e-39	2.64e-13	1	1	1	1	1	1	1	1	6.04e-34	1	1	3.54e-11	1.79e-08	1	1	1	1	1	1	1	1	1	1	1	1	7.41e-09	8.28e-37	1	1	1	1	1	1	1	1.41e-26	7.59e-09	3.77e-40	1	1	1	1	1
NR5A2	2.83e-18	1	1.85e-12	1	1	3.74e-13	2.23e-12	5.54e-08	1	1	1	1	1	1	1	1.11e-13	1	1	1	1.02e-10	1	1	1	1	1	1	1	1	1	1	1	2.78e-08	2.39e-16	3.96e-58	1	1	1	0.000253	1	1	1.76e-08	6.68e-29	1	1.51e-13	1	1	3.46e-10	1	1
NR6A1	2.83e-24	1	1	1	1	8.71e-08	1	1	1	1	1	1	1	1	1	1	1	1	1	1	1	1	1	1	1	1	1	1	1	1	1	1	1	1.7e-50	1	1	1	1	1	2.71e-09	1	5.7e-11	1	1	1	1	1	1	1
NRF1	1	1	7.81e-08	1	1	1	1	1	1	1	1	1	1	1	1	6.55e-08	1	1	1	1	1	1	1	1	1	1	1	1	1	1	1	1	1	1	1	1	1	1.64e-12	1	1	0.00026	1	1	1	1	1	6.13e-17	1	1
OLIG2	1	1	6.23e-44	1	1	3.81e-27	1	0.000113	1	1	1	1	1	1	1	1.04e-20	1	4.41e-21	1	4.5e-10	2.86e-21	1	1	1	1	1	1	1	1	1	1	1	1.26e-09	9.08e-50	1	1	1	1	1	1	1	2.85e-27	1.69e-08	6.55e-20	1	1	1	1	2.67e-10
OSR2	2.58e-76	1	1.25e-283	2.8e-08	1	5.49e-35	1.24e-35	1	1	8.43e-11	1	1	1	1	1	1.05e-43	1	6.34e-10	3.4e-08	1	2.17e-27	1	6.99e-32	1	1	1	1	1	1	1	1	1	1	6.35e-89	2.36e-20	1	1	2.89e-10	1	1.75e-08	1	8.93e-225	1.19e-09	2.82e-37	1	1	1	0.000154	1
OTX2	4.73e-32	1	4.95e-21	1	1	1.31e-31	2.55e-17	1	1	1	0.000226	1	1	1	7.25e-09	5.12e-18	1	1	1	1	1.69e-09	1	1	1	1	1	1	1	1	1	1	1	1	1.82e-67	1	1	1	3.2e-57	1	1.05e-12	6.8e-37	9.28e-31	7.18e-08	5.19e-22	1	1	5.53e-47	1	1
OVOL1	4.3e-11	1	1.75e-21	4.34e-08	1	1.36e-15	1.98e-22	1	1	1	1	1	1	1	1	5.92e-26	1	1	1	1	1	1	1	1	1	1	1	1	1	1	3.07e-74	1	1e-22	1.65e-56	1	1	1	1	1	1	1	4.74e-16	1	3.08e-18	1	1	1	1	1
OZF	1	1	7.88e-09	8.16e-10	1	1	1	1	1	1	1	1	1	1	1	1	1	1	1	1	0.000115	1	1	1	1	1	1	1	1	1	1	1	1	1	1	1	1	1	1	1	1	1	1	1	1	1	1	1	9.34e-08
P53	2.9e-64	1	2.23e-41	1	1	9.5e-36	1	1	1	1	1	1	1	1	1	2.1e-23	1	1	1	1	1	1	1	1	1	1	1	1	1	1	1	1	3.34e-12	1.38e-33	1	1	1	1	1	1	1	3.56e-29	1	1.64e-24	1	1	1	1	1
P63	1	1	2.72e-25	1	1	6.09e-24	1	1	1	1	1	1	1	1	1	1.23e-16	1	1	1	1	1	1	1	1	1	1	1	1	1	1	1	1	2.29e-09	8.66e-51	1	1	1	1	1	1	1	3.75e-21	1	6.4e-14	1	1	1	1	1
P73	4.14e-66	1	3.82e-31	1	1	3.88e-30	1	0.000173	1	1	1	1	1	1	1	1.01e-21	1	1	1	1	1	1	1	1	1	1	1	1	1	1	1	1	8.39e-17	5.4e-62	1	1	1	1	0.000132	1	1	1e-29	1	6.64e-23	1	1	1	1	1
PATZ1	2.41e-63	1	3.29e-17	1	1	0.000112	6.09e-18	1	3.14e-09	1	1	1	1	8.18e-09	1	3.46e-08	1	1	5.86e-11	1	1	1.22e-28	1.29e-11	1	1	1	1	1	1.75e-43	1	3e-08	1	1.2e-08	1.42e-30	1	3.33e-10	4.34e-09	1	1	5.22e-17	1	6.2e-11	1	1	1.09e-30	1	6.74e-12	2.99e-20	7.48e-10
PAX5	5.04e-245	1	1.48e-09	1	1	3.75e-13	6.96e-14	1	1	1	1	1	1	5.34e-17	1	5.77e-12	1	1	1	1	1	1	1	1	1	1	1	1	1	1	1	1	1	2.25e-08	1	1	0.000217	1	1	1	7.35e-09	1	1	4.97e-11	1	1	6.89e-12	1	1
PAX6	7.39e-140	1	5.85e-08	1	1	0.00015	7.4e-20	1	1	1.44e-08	1	1	1	1	1	1	1	0.000186	1	1	1	1	1	1	1	1	1	1	1	1	1	1	1	7.19e-18	1	1	1	0.00013	1	1	1	4.95e-11	1.86e-09	1	1.19e-09	1	3.91e-14	1	1
PBX1	5.71e-60	1	4.09e-36	1	1	1.27e-34	7.69e-15	1	1	1	1	1	4.28e-70	1	1	1.55e-34	1	1	1	1	1	1	1.81e-106	1	1	1	1	1	1	1	9.32e-11	1	1.42e-126	1.66e-127	1	1	1	1	1	1	4.86e-09	2.74e-38	1	3.38e-30	1	1	5.12e-10	1	1
PBX2	4.36e-08	1	1	1.52e-12	1	2.5e-08	6.28e-09	1	1	1	3.92e-08	1	4.65e-16	1	0.000269	1	1	2.09e-10	2.67e-10	1	8.88e-22	1	1.81e-11	1	1	1	1	1	1	1	8.62e-37	1	4.66e-23	3.58e-254	1	1	1	2.02e-13	1	1	1	4.56e-46	1.26e-13	1	1	1	1	1	1
PBX3	1	1	2.08e-151	1.11e-13	1	1.03e-24	1.51e-20	1	1	1	1	1	2.32e-55	1	1	5.92e-29	1	1	1	1	1	1	1.47e-102	1	1	1	1	1	0.000272	1	3.02e-16	1.01e-08	9e-122	2.96e-111	1	1	1	1.55e-11	1	1	1.2e-13	1.4e-109	1	2.53e-24	1	1	3.21e-21	6.74e-09	1
PDX1	7.73e-44	1	1	1	1	1	2.31e-08	1	1	1	4.23e-11	1	6.52e-20	1	7.63e-14	1	1	1	5.93e-09	1	7.86e-25	1	3.05e-18	1	1	1	1	1	1	1	1.71e-11	1	5.73e-24	3.24e-252	1	4.47e-08	1.36e-11	1	1	1	1	1	3.51e-25	1	1	1	1	1	1
PEBB	4.58e-14	1	3.97e-49	0.000242	1	4.32e-81	5.98e-119	1	1	4.76e-14	1	0.000124	1	1	6.3e-09	6.09e-72	1	6.39e-21	0.000243	1	1	1.11e-09	1	1	1	1	1	1	1	1	2.62e-09	1.07e-11	1.57e-08	6.29e-214	1	2.27e-09	7.58e-15	1	1	1	1	1.74e-48	5.9e-09	7.91e-69	1	3.92e-10	1	1	1
PIT1	2.6e-18	1	3.83e-16	1	1	1.79e-21	4.17e-38	1	1	1	1	1	1	1	1	2.11e-18	1	1	1	1	0.000178	1	1	1	1	1	1	1	1	1	1	1	1.63e-09	3.5e-148	1	0.000197	0.000117	1	1	1	1	5.65e-11	1	6.01e-19	1	1	1.66e-11	7.46e-09	1
PKNX1	1.79e-56	1	3.89e-31	1	1	8.83e-28	5.82e-13	1	1	1	1	1	1.5e-79	1	1	1.79e-29	1	1	1	1	1	1	6.65e-110	1	1	1	1	1	1	1	4.35e-12	1	2.16e-128	2.42e-137	1	1	1	6.06e-10	1	1	2.42e-14	1.31e-26	1	1.23e-26	1	1	3.09e-12	1	2.2e-09
PO2F1	2.15e-25	1	1.3e-65	1	1	7.27e-81	7.18e-99	1	1	1	1	1	1	1	1	8.19e-82	1	1	1	1	1.29e-10	1.6e-23	1	1	1	1	1	1	1	1	6.05e-08	1	2.42e-09	2.04e-48	1	1	1	1.11e-08	1	1	1	2.42e-52	9.89e-19	5.32e-83	3.19e-30	1	1	1	0.000118
PO2F2	1.41e-19	1	4.28e-21	1	1	5.4e-20	2.27e-27	1	1	1	1	1	1	1	1	1.05e-22	1	1.83e-09	1	1	6.17e-30	1	1	1	1	3.89e-10	1	1	1	1	1	1	1	1.89e-16	1	0.000169	1	1.22e-10	1	1	1	5.24e-14	2.56e-13	7.23e-20	1	1	1.54e-14	1	6.23e-08
PO3F1	7.64e-43	1	1.87e-43	1	1	5.46e-43	1.09e-29	1	1	1	1	1	1	1	1	2.78e-46	1	1	1	1	1	1	1	1	1	1	1	1	1	1	1	1	1.52e-09	1.44e-200	1	1	1	1.72e-26	1	1	5.28e-15	3.42e-38	1	1.19e-49	1	1	4.94e-24	1	1
PO3F2	6.63e-36	1	2.05e-54	1	1	2.54e-60	1.53e-11	0.000211	1	1	1	1	1	1	1	2.37e-62	1	1	1	1	1.64e-16	1.1e-25	2.12e-10	1	1	1	1	1	1	1	1	1	0.000158	8.63e-20	1	1	1	1	1	1	1	3.23e-42	1	2.59e-69	3.23e-28	1	1	1	1
PO5F1	8.21e-12	1	4.68e-12	1	1	6.71e-13	1.21e-37	1	1	1	1	1	1	1	1	1.46e-11	1	1	1	1	4.06e-21	1	1	1	1	1	1	1	1	1	1	1	1	1	1	1	1	2.28e-15	1	1	1	1.26e-10	1	1.62e-11	1	1	1	1	4.99e-08
PPARA	7.11e-19	1	8.07e-21	1	1	6.11e-27	5.82e-43	1	1	1	1	1	1	1	1	1.11e-21	1	1	1	2.13e-08	0.000196	8.44e-11	1	1	1	1	1	1	6.65e-13	1	1	1	0.000141	3.25e-72	1	9.88e-31	1.02e-11	1	1	1	1	1.1e-18	1	8.86e-20	1	1	2.78e-13	1	2.7e-14
PPARG	7.38e-17	1	1	1	1	1	1.41e-21	1	1	1	1	1	1	1	1	1	1	1	1	1	1	3.3e-08	1	1	1	1	1	1	1.13e-11	1	1	1	1	1.07e-10	1	1	1	1	1	1	1.14e-08	1.1e-17	0.000179	1	1	1	1	1	1
PRD14	1	1	6.03e-18	1	1	7.57e-20	0.000229	1	1	1	1	1	1	1	1	3.81e-22	1	1	1	1	1	1	1	1	1	1	1	1	1	1	1	1	1	7.12e-92	1	1	1	4.74e-08	1	1	1	4.48e-19	1	1.34e-22	1	1	1	1	1
PRDM1	1	1	2.18e-12	1	1	8.1e-18	5.7e-101	1	2.94e-08	1	1	1	1	2.08e-09	1	3.38e-12	1	6.65e-09	1	1	5.05e-25	1.01e-12	1	1	1	1	1	1	1.24e-09	1	1	1	1	3.46e-39	1	5.47e-78	9.47e-17	1	1	6.41e-08	1	1.07e-13	1	5.25e-15	1	1	1	0.000183	1.66e-28
PRDM6	6.55e-15	1	2.96e-17	1	0.000254	6.38e-20	1.89e-26	1	1	1	1	1	1	1	1	2.93e-19	1	1	5.76e-10	5.06e-16	3.52e-13	1	6.83e-08	1	1	4.86e-24	1	1	1	1	1	1	1	8.25e-20	1	1.56e-80	5.98e-10	0.00017	1	1	1.18e-10	8.64e-14	1	2.13e-20	1	1	1.33e-15	1	6.89e-34
PRGR	4.89e-18	1	1.12e-13	1	1	6.26e-12	1.18e-08	1	1	1	1	1	1	1	1	5.78e-14	1	1	1	1	1.23e-12	1	1	1	1	1	1	1	1	1	1	1	1	3.97e-79	1	1	1	3.77e-16	1	1	1	1.29e-11	1	1.79e-14	1	1	1	1	1
PRRX2	1.26e-64	1	1.44e-39	1	1	1.07e-38	1.93e-12	1	1	3.21e-14	1	1	1	1	1	5.21e-44	1	9.01e-36	1	1	1	1	1	1	1	1.45e-12	1	1	1	1	1	1	1	1.75e-09	1	1	1	1	1	1	1	4.94e-42	1	1.44e-47	1	1	1	1	1
PTF1A	7.53e-20	1	3.6e-17	1	1	4.61e-21	4.22e-13	1	1	1	1	1	1	1	1	6.57e-20	1	1	1	6.37e-09	1	1	2.28e-09	1	1	1	1	1	1	1	1	5.03e-08	0.00016	7.04e-68	1	0.0002	1	1	1	1	1	3.04e-15	1.24e-11	2.82e-20	1	1	1	1	1.78e-11
RARA	4.98e-43	1	2.15e-22	1	1	9.55e-33	1	1	1	1	1	1	1	1	1	1.61e-25	1	2.76e-10	1	1	1	1	1	1	1	1	1	1	1	1	1	1	0.000195	2.8e-154	1	1	1	5.54e-16	1	1	1	1.05e-22	1	6.13e-23	1	1	2.06e-44	1	1
RARG	1.94e-11	1	1.71e-44	1	1	4.1e-68	3.54e-26	1	1	2.18e-08	1	1	1	1	1	4.27e-40	1	1	1.31e-18	1.14e-22	1	1	1	1	1	1	1	1	1	1	1	1	5.59e-44	1.18e-240	1	1	1	5.08e-15	1	1	1.72e-09	3.14e-47	8.44e-27	1.46e-57	1	1	1.56e-10	1	1
REL	1.59e-24	1	5.55e-130	7.4e-08	1	9.98e-148	9.11e-55	2.11e-09	1	1	1	1	1	1	0.000191	3.48e-157	1	3.68e-17	1	1.01e-08	0.000128	1	1	1	1	1	1	1	1	1	2.35e-62	1.14e-14	5.3e-16	1.12e-47	1	1	1	9.16e-10	1	1	1	9.44e-99	1	2.53e-154	2.72e-08	1	1.02e-10	1	1.04e-08
RELB	6.55e-14	1	1.49e-23	1	1	5.84e-25	3.17e-73	1	1	1	1	1	1	1	1	2.72e-22	1	1.3e-08	1	1	3.56e-08	1	1	1	1	1	1	1	1	1	1	1	1	1.83e-13	1	1	1	2.04e-12	1	1	1.87e-13	7.63e-16	1	4.86e-20	1	1	4.3e-21	1	1
REST	1	1	1	1	1	1.14e-09	1	1	1	1	1	1	1	1	1	2.55e-08	1	1	1	1	1	1	1	1	1	1	1	1	1	1	1	1	1	1	1	1	1	1	1	1	1	1	1	9.58e-10	1	1	1	1	1
RFX1	2.68e-115	1	3.41e-47	1	1	2.49e-21	1	1	1	1	1	1	1	1	1	1.21e-22	1	1	0.000206	1	1	1	1	1	1	1	1	1	1	1	1	1	1	4.7e-09	1	1	1	1	1	1	4.31e-08	2.7e-40	5.17e-12	4.02e-19	1	1	1	1	1
RFX2	9.49e-69	1	8.01e-18	1	1	5.53e-13	1	1	1	1	1	1	1	1	1	2.43e-09	1	1	3.91e-18	1	1	1	1	1	1	1	1	1	1	1	1	1	1	7.76e-12	1	0.000144	1	1	1	1	2.35e-08	1.31e-16	4.1e-13	1.5e-11	1	1	1	1	1
RFX3	7.92e-08	1	1	1	1	1	1	1	1	1	1	1	1	1	1	1	1	1	5.65e-15	1	1	2.52e-08	1	1	1	1	1	1	1	1	1	1	1	1	1	1	6.51e-08	1	1	1	1	1	2.1e-08	1	1	1	1	1	1
RFX5	5.57e-106	1	7.02e-44	1	1	6.65e-23	1	1	1	3.66e-11	1	1	1	1	1	1.41e-22	1	4.5e-08	1	1	5.57e-34	1	1	1	1	1	1	1	1	1	3.45e-10	1	1	9.17e-15	1	1	1	1	1	3.17e-12	1	1.44e-39	5.08e-16	2.26e-22	1	1	0.000142	1	1
RORA	8.56e-09	1	1.75e-71	1	1	2.41e-129	5.41e-13	1	1	1	1	1	1	1	1	4.65e-89	1	1.94e-08	5.98e-18	9.46e-11	1	1	1	1	1	1	1	1	8.36e-11	1	1.48e-10	1	2.37e-19	3.84e-169	5.92e-10	1	1	3.89e-09	1	1	1	1.13e-62	1	7.52e-90	1	1	2.81e-08	0.000146	1
RORG	1.08e-58	1	1.44e-48	1	1	2.51e-75	6.51e-11	1	1	1	3.25e-11	1	1	1	4.57e-17	3.88e-65	0.00026	7.71e-08	1.99e-08	3.22e-10	1	1	1	1	1	1	1	1	1	1	1	1	3.41e-34	1.79e-158	4.86e-08	0.000128	1	1	1	1	1	2.23e-48	5.01e-18	1.13e-61	1	1	8.26e-12	1	1
RUNX1	3.85e-13	1	5.47e-48	1	1	1.55e-52	3.24e-22	1	1	1	1	1.75e-08	1	1	1	6.11e-61	1	1.04e-26	1	1	1.02e-08	2.01e-08	1	1	1	1	1	1	1	1	1	1.03e-12	3.25e-08	4.26e-197	1	1.4e-10	5.61e-18	1	1	1	1	9.03e-37	2.14e-13	1.36e-57	1	1	8.76e-14	1	4.43e-08
RUNX2	1.71e-40	1	1.8e-96	1.12e-14	1	1.04e-107	9.55e-185	1	1	8.08e-08	1	1.9e-10	1	1	1	8.54e-134	1	9.51e-31	1	1	1	1	1	1	1	1	1	1	1	1	1.72e-23	1.5e-10	1.53e-11	6.66e-239	1	6.16e-09	8.53e-17	1	1	1	1	8.43e-80	1	1.07e-114	1	1	1	2.24e-08	1
RUNX3	7.25e-13	1	1.12e-50	1	1	3.12e-51	1.08e-21	1	1	1.98e-08	1	4.81e-08	1	1	1	4.99e-42	1	2.28e-21	1	1	1.16e-08	2.95e-09	1	1	1	1	1	1	1	1	1	5.2e-13	1.82e-09	1.48e-204	1	2.65e-11	5.86e-17	1	1	1	1	3.83e-36	4.47e-14	7.1e-57	1	1	2.39e-14	1	1
RXRA	9.65e-16	1	6.6e-39	1	1	2.68e-60	6.25e-11	1	1	1	1	1	1	1	1	7.02e-54	1	1	0.00026	1.55e-13	1	1	1	1	1	1	1	1	1	1	1	1	2.28e-27	1.36e-141	1	1	1	6.06e-10	1	1	1	8.23e-34	1.18e-11	1.49e-51	1	1	1.04e-09	1	1
RXRB	7.52e-76	1	1.71e-35	1	1	1.45e-51	1.95e-21	1	1	1	1	1	1	1	1	3.91e-43	1	5.42e-10	6.03e-08	5.98e-25	1	1	1	1	1	1	1	1	1	1	1	1	3.76e-29	1.26e-194	1	1	1	1	1	1	1	1.58e-33	5.47e-29	3.32e-44	1	1	2.49e-08	1	1
RXRG	1	1	4.44e-33	1	1	1	1.52e-09	1	1	1	1	1	1	1	1	1	1	1	1	1	1	1	1	1	1	1	1	1	1	1	1	1	1	1.67e-08	1	1	1	1	1	1	1	2.4e-30	1	1	1	1	4.29e-09	1	1
SALL4	7.48e-148	1	0.000153	1	1	3.68e-11	5.43e-08	1	1	1	1	1	1	1	1	1.19e-08	1	1	1	1	1	3.85e-11	1	1	1	1	1	1	4.02e-19	1	6.83e-10	1	3.38e-12	6.1e-199	1	1	1	1	1	1	0.000128	1	1	7.7e-10	1	1	1.09e-13	1.88e-08	1
SIX1	3.14e-12	1	2.54e-22	1	1	4.06e-09	7.45e-33	1	1	1	1	1	1	1	1	3.58e-11	1	1	1	1.63e-08	3.45e-13	1	1	1	1	1	1	1	1	1	4.12e-09	1	2.66e-22	5.09e-98	1	1	1	1.49e-10	1	1	1	2.23e-26	5.08e-14	1.31e-09	1	1	2.13e-11	1	1
SIX2	5.86e-11	1	5.02e-27	1	1	2.82e-11	6.23e-121	1	1	1	1	1	1	1	1	1.34e-08	1	1	1	9.42e-11	1.62e-11	1	1	1	1	1	1	1	1	1	6.31e-10	1	6.64e-17	7.45e-90	1	8.4e-09	1	1	1	1	1	1.5e-37	2.48e-15	1.69e-09	1	1	5.05e-17	1	4.94e-08
SMAD2	1.08e-77	1	5.09e-18	1	1	3.59e-16	7.89e-17	1	1	1	1	1	1	5e-12	1	2.99e-14	1	1	1	1	1	1.63e-09	1	1	1	1	1	1	1	1	1	1	5.67e-11	1.35e-87	1	0.000142	6.35e-08	2.11e-14	0.000237	1	5.82e-13	2.91e-13	1	4.52e-15	1	1	4.18e-27	1	1
SMAD3	8.19e-63	1	3.33e-73	1	1	3.61e-26	4.32e-148	1	1	1.41e-09	1	1	1	1	1	1.02e-33	1	1	2.87e-09	1	1	1	1	1	1	1	1	1	1.34e-09	1	1	1	1	7.6e-64	1	6.23e-08	1	2.83e-12	1	1	3.92e-09	2.59e-43	2e-31	9.5e-27	1	1	7.62e-09	1	1
SMAD4	8.79e-83	1	9.18e-79	1	1	4.33e-27	6.86e-16	1	1	1	1	1	1	7.91e-11	1	8.6e-31	1	1	1	1	1	1	1.27e-08	1	1	1	1	1	1	1	1	1	2.55e-14	1.28e-291	1	1	3.11e-08	1	1	1	1.02e-09	3.35e-45	1	6.15e-30	1	1	3.5e-16	1	1
SMCA1	1	1	9.47e-23	1	1	1.01e-23	1.64e-18	1	1	1	1	1	1	1	1	1.4e-24	1	2.91e-08	1	1	1.63e-28	3.37e-14	1	1	1	1	1	1	1	1	1	1	1	4.27e-141	1	2.19e-26	2.17e-17	1	1	1	1.2e-10	2.01e-20	1	6.88e-25	2.44e-17	1	1.21e-13	1	5.13e-18
SMCA5	2.6e-254	1	1.03e-19	1	1	1	1.09e-09	1	1	1	1	1	1	1.8e-09	1	1	1	1	1	1	1.2e-52	2.14e-46	2.41e-10	1	1	1	1	1	1	1	1	1	7.03e-08	1.9e-43	1	5.42e-10	1	7.23e-08	1	1	1.35e-08	5.4e-16	1	1	4.73e-38	1	3.58e-10	1	8.21e-10
SNAI1	1.94e-29	1	1.93e-12	1	1	5.21e-15	2.47e-08	1	1	1	1	1	1	1	1	1.04e-11	1	1	1	1	1	1	1	1	1	1	1	1	1	1	1	1	7.4e-08	7.63e-35	1	1	1	7.51e-09	1	1	1	1.98e-08	1	4.33e-14	1	1	1	1	1
SNAI2	4.91e-41	1	1	1	1	2.65e-11	1	1	1	1	1	1	1	1	1	2.88e-11	1	1	1	1	1	1	1	1	1	1	1	1	1	1	1	1	1	1	1	1	1	1	1	0.000156	1	1	1	4.99e-11	1	1	1	1	1
SOX10	1	1	1.76e-09	1	1	3.42e-11	3.76e-21	1	1	1	1	1	1	1	1	6.71e-09	1	1	1	1	9.79e-40	1	1	1	1	1	1	1	1	1	1.96e-09	1	4.99e-10	7.89e-166	1	1	1	1	1	1	1	1	1	7.71e-08	6.09e-11	1	1	1	1
SOX17	1.13e-30	1	1.34e-61	1	1	4.1e-65	1	1	1	1	1	1	1	1	1	6.53e-76	1	1	1	1	1	1	1	1	1	4.89e-09	1	1	1	1	1	1	7.76e-12	9.99988867182683e-321	1	2.88e-24	1	1	1	1	1	4.06e-32	1	1.03e-68	1.15e-11	1	1	1	2.83e-10
SOX2	8.35e-34	1	1.96e-17	1	1	3.38e-17	1.66e-08	1	1	1	1	1	1	2.12e-09	1	4.68e-16	1	1	1	1	1.19e-28	1	1	1	1	3.9e-08	1	1	1	1	1	1	1	6.38e-64	1	1.27e-73	7.46e-16	1	1	1	1	7.21e-11	1	2.22e-13	1	1	1	1	1.62e-37
SOX3	8.35e-34	1	1.96e-17	1	1	3.38e-17	1.66e-08	1	1	1	1	1	1	2.3e-08	1	4.68e-16	1	1	1	1	5.07e-35	1	1	1	1	1.35e-09	1	1	1	1	1	1	1	6.38e-64	1	1.27e-73	7.46e-16	1	1	1	1	7.21e-11	1	2.22e-13	1	1	1	1	1.62e-37
SOX4	9.51e-20	1	1.22e-10	1	1	1.01e-08	7.36e-09	5.67e-08	1	1	1	1	1	5.02e-09	1	1.13e-09	1	1	1	1	1.34e-36	1	1	1	1	3.9e-08	1	1	1	1	1	1	1	4.19e-68	1	1.05e-77	1.04e-17	1	1	1	1	6.9e-13	1	0.000152	1	1	1	1	4.9e-38
SOX5	1.72e-10	1	4.04e-60	1	1	1.17e-13	1	1	1	1	1	1	1	1.78e-08	1	5.28e-20	1	1	1	1	5.67e-08	1	1	1	1	1	1	1	1	1	1	1	1	5.56e-183	1	1	1	1	1	1	1	3.56e-65	1	6.37e-12	1	1	1	1	1.79e-12
SOX9	8.46e-16	1	0.000182	1	1	3.61e-11	9.25e-23	1	1	1	1	1	1	1	1	3.35e-11	1	0.000235	1	1	1.67e-41	1	1	1	1	1	1	1	1	1	1	1	8.41e-13	1.98e-303	1	1	1	1	1	1	1	2.36e-08	1	2.68e-10	1	1	1	1	1
SP1	1	1	3.29e-10	1	1	1	1	1	1	1	1	1	6.32e-10	1	1	1	1	1	1.1e-11	1	1	1	5.44e-16	1	1	1	1	1	1.41e-13	1	1	1	2.55e-21	1.11e-214	1	1	1	1	1	1	1	1	1	1	1	1	1	1.88e-12	1
SP2	1.65e-157	1	3.87e-16	1	1	3.72e-27	1	1	1	1	1	1	3.92e-17	1	1	2.08e-22	1	1	7.22e-25	1	1	5.62e-09	3.95e-12	1	1	1	1	1	1.41e-19	1	2.48e-11	1	3.38e-16	8.85e-18	1	1	1	0.000261	1	5.08e-08	1.66e-10	4.06e-14	1	8.29e-26	1	1	3.95e-17	4.68e-14	1
SP3	8.89e-27	1	5.4e-10	1	1	6.67e-14	1	1	1.07e-12	4e-08	1	1	1.15e-13	1	1	1.92e-09	1	1	1.29e-16	1	1	7.38e-11	5.72e-14	1	1	1	1	1	2.34e-33	1	1	1	6.48e-16	6.79e-192	1	1	1	2.23e-08	1	1	1	5.64e-08	1	1.77e-08	1	1	1.84e-14	2.63e-22	1
SP4	8.33e-140	1	5.54e-10	1	1	7.19e-16	3.78e-10	1	3.79e-16	1	1	1	9.32e-11	1	1	1.89e-12	1	1	2.11e-22	1	1	2.26e-11	1.02e-11	1	1	1	1	1	3.01e-43	1	1.9e-12	1	1.01e-16	8.75e-177	1	0.000122	1	1	1	1.56e-08	1	3.31e-08	1	1.26e-09	1	1	1.21e-15	6.52e-20	0.000202
SPI1	1	1	4.46e-82	1	1	5.75e-78	3.42e-08	1	1	1	1	1	1	1	1	1.95e-85	1	1	1	1	1.84e-19	3.52e-11	1	1	1	1	1	1	3.33e-08	1	4.63e-14	1	1.42e-15	7.05e-118	1	5.09e-08	0.000114	1	1	0.000162	1	1.11e-52	1	1.38e-80	1	1	1	8.46e-08	0.000114
SPIB	1	1	3.23e-71	1	1	3.95e-62	1	1	1	1	1	1	1	1.41e-08	2.18e-10	3.77e-73	1	1	1	1	1	1.8e-09	1	1	1	1	1	1	0.000126	1	4.42e-14	3.46e-08	1.15e-11	2.15e-92	1	1	1	1	1	1	1	1.99e-46	1	5.84e-74	1	1	1	1	1
SRBP1	1.83e-40	1	2.98e-15	1	1	1.27e-26	1.68e-30	1	1	1	2.69e-09	1	1	1	4.51e-14	4.89e-22	1	1	1	1	1.51e-08	6.24e-08	1	1	1	1	1	1	0.000141	1	1	1	6.94e-48	5.08e-251	1	1	1	1	1	1	1.73e-08	2.5e-16	1	5.02e-27	1	1	1.37e-09	1	1
SRBP2	2.75e-20	1	8.87e-29	1	5.68e-08	4.35e-50	7.8e-140	1	1	1	1	1	1	1	1	8.01e-41	1	0.000153	1.54e-17	1	1	2.91e-08	1	1	1	1	1	1	1	1	6.92e-21	1	2.51e-08	2.56e-21	1	1	1	1	1	1	5.3e-08	3.62e-30	1	7.02e-48	1.88e-16	1	2.44e-08	4.18e-09	1
SRF	0.000245	1	5.61e-56	1	1	2.55e-58	1	1	1	1	1	1	1	1	4.2e-08	8.86e-71	1	1	1.5e-17	1	1	1	1	1	1	1	1	1	1	1	1	1	2.51e-09	4.91e-271	1	3.57e-08	1	1	1	1	1	6.03e-48	1	2.73e-68	1	1	1	1	1
SRY	1	1	1.04e-12	1	1	1.26e-13	6.99e-10	1	1	1	1	1	1	1	5.47e-08	1.49e-11	1	1	1	1	1	1	1	1	1	1	1	1	1	1	1	1	1	1.14010000496208e-316	1	1	1.38e-11	1	1	1	1	1.19e-12	1	2.25e-11	1	0.000164	1	1	8.42e-19
STA5A	5.33e-19	1	9.41e-27	1	1	6.33e-30	1	1	1	1	1	1	1	1	1	2.68e-34	1	1	1	1	1.54e-44	1	1	1	1	5.79e-08	1	1	1	1	7.47e-17	1	0.000124	1.39e-14	1	4.75e-08	1	1	1	1	1	1.74e-20	1	9.97e-28	1	1	1	1	1
STA5B	2.27e-18	1	5.77e-46	1	1	9.42e-45	1	1	1	1	1	1	1	1	1	3.43e-52	1	1	1	1	1.51e-37	1	1	1	1	1	1	1	1	1	5.44e-19	1	1	1.8e-18	1	3.61e-11	1	1	1	1	1	2.92e-34	1	1.37e-51	1	1	1	1	1
STAT1	1.57e-12	1	3.69e-27	1	1	3.32e-30	4.75e-08	1	1	1	1	1	1	1	1	3.3e-35	1	1	1	1	1.12e-33	1	1	1	1	1	1	1	1	1	1.91e-14	1	1	6.14e-15	1	0.000191	1	1	1	1	1	4.98e-25	1	6.95e-32	1	1	1	1	1
STAT2	6.83e-15	1	2.59e-09	5.59e-08	1	1.4e-08	1	1	1	1	1	1	1	4.92e-09	1	5.96e-08	1	1.14e-08	1	1	5.94e-09	1	1	1	1	1	8.06e-08	1	4.41e-10	1	1	1	1	5.27e-09	1	1.09e-10	5.89e-19	1	1	0.000197	1	7.23e-09	1	0.000128	0.000219	1	7.45e-13	5.69e-10	4.9e-09
STAT3	1.4e-09	1	7.4e-46	1	1	1.46e-52	1.42e-08	1	1	1	1	1	1	1	1	2.09e-60	1	1	1	1	3.96e-30	1	1	1	1	1	1	1	1	1	2.05e-50	1	5.21e-16	1.32e-57	1	7.12e-08	1	3.02e-08	1	1	1	1.27e-43	1	3.5e-66	1	1	1	1	1
STAT4	1.83e-10	1	1.04e-41	1	1	4.01e-44	1.08e-126	1	1	1	1	1	1	1	1	2.52e-50	1	1	1	1	6.06e-28	1	1	1	1	1.39e-08	1	1	1	1	1.42e-26	1	8.64e-08	1.45e-29	1	3.99e-11	1	1	1	1	1	1.99e-39	1	6.11e-55	1	1	1	1	8.21e-09
STAT6	1.63e-24	1	6.49e-14	1	1	1.32e-13	3.93e-08	1	1	1	1	1	1	1	1	1.22e-15	1	1	1	1	2.6e-41	1	1	1	1	1	1	1	1	1	1	1	1	2.62e-144	1	1	1	1	1	1	1	8.15e-10	1	8.63e-14	1	1	1	1	1
STF1	4.24e-15	1	7.5e-14	1	1	7.97e-21	1.06e-19	5.44e-09	1	1	1	1	1	1	1	8.73e-17	1	1	1	5.31e-08	1	1	1	1	1	1	1	1	1	1	1	0.000226	1	1.02e-15	1	1	1	1	1	1	4.62e-08	2.93e-17	1	3.67e-19	1	1	2.26e-09	1	1
SUH	7.14e-26	1	6.67e-99	1	1	2.17e-104	8.66e-98	4.48e-08	1	1	1	1	1	1	1	3.69e-119	1	2.93e-09	1.65e-10	1	3.96e-32	1.24e-10	1	1	1	1	1	1	1	1	1.91e-55	1	1.23e-19	5.62e-66	1	4.68e-08	7.62e-33	1	1	1	1.46e-10	2.02e-70	1	5.44e-111	1	1	1.22e-08	0.000151	3.96e-08
TAF1	2.21e-73	1	6.52e-19	1	1	9.96e-24	1	1	2.71e-08	1	1	1	1	1	1	7.83e-23	1	3.53e-09	1.02e-08	1	1	8.72e-10	5.06e-14	1	1	1	1	1	1.2e-20	1	1.22e-08	1	4.37e-11	1.11e-59	1	1.03e-08	1	1	1	5.29e-08	4.78e-12	3.51e-17	1	1.13e-19	1	1	1	2.26e-12	2.5e-10
TAL1	1	1	1.34e-13	1	1	1	1	1	1	1	1	1	1	1	1	1	1	1	1	1	1	1	1	1	1	1	1	1	1	1	1	1	1.51e-10	3.59e-246	1	1	1	3.52e-10	1	1	1	1	1	1	1	1	5.23e-24	1	1
TBP	1.72e-10	1	5.76e-09	1	1	6.53e-09	2.26e-28	1	1	1	1.77e-16	1	1	1	9.29e-20	9.75e-12	1	0.000192	1	1	1.87e-31	1	1	1	1	1	1	1	4.59e-10	1	1	1	1	5.86e-10	1	1.05e-08	1	1	1	3.93e-08	1	5.91e-10	1	1.82e-09	1	1	1	3.55e-09	1
TBX21	1.04e-50	1	1	1	1	1	8.26e-27	1	1	1	1	1	1	1	1	1	1	1	1	1	1	1	1	1	1	1	1	1	1	1	1	1	1	1	1	1	1	1	1	1	1	1	1	1	1	1	1	1	1
TBX3	7.98e-58	1	1.24e-31	1	1	1.2e-37	1.19e-34	1	1	4.56e-10	1	1	1	1	1	2.81e-32	1	1	1	1	3.81e-13	1	1	1	1	1	1	1	2.56e-08	1	4.15e-26	1	2.26e-09	4.25e-134	1	1	1	0.000277	1	1.24e-10	1	4.16e-26	1	2.13e-33	1	1	2.61e-14	1	1
TCF7	1.65e-08	1	1	1	1	0.000151	9.98e-176	1	1	1	1	1	1	1	1	1	1	3.42e-15	1	1	6.72e-38	1	1	1	1	1	1	1	1	1	1	1	1	4.39e-74	1	2.42e-29	1.88e-09	5.74e-18	1	1	5.53e-10	1	0.000167	8.2e-08	1	1	7.43e-09	1	1.13e-10
TEAD1	8.81e-25	1	3.61e-87	1	1	1.56e-93	7.18e-99	1	1	1	1	1	1	1	1	1.39e-99	1	1	1	1	1.2e-27	2.09e-26	3.3e-10	1	1	1	1	1	1	1	1.52e-13	1	0.000197	1.02e-59	1	4.81e-09	6.66e-09	1	1	1	1	7.07e-84	1	3.85e-92	3.55e-27	1	1	1	1
TEAD4	2.55e-22	1	1.21e-91	1	1	1.49e-100	9.26e-99	1	1	1	1	1	1	1	1	1.84e-109	1	1	1	1	6.17e-31	3.07e-25	8.45e-09	1	1	1	1	1	1	1	6.76e-13	1	0.000228	7.99e-54	1	1.97e-08	1	6.64e-17	1	1	6.86e-18	5.26e-86	1	8.6e-99	2.48e-27	1	2.65e-15	1	1
TF65	5.18e-12	1	3.02e-16	1	1	7.1e-17	1.24e-13	3.79e-09	1	1	1	1	1	1	0.000136	4.49e-14	1	3.66e-15	1	1	1	1	1	1	1	1	1	1	1	1	1	1.29e-11	1	7.31e-08	1	1	1	3.06e-14	1	1	1.35e-08	1.28e-10	1	1.39e-13	1	1	1	1	1
TF7L1	1	1	2.67e-08	1	1	1	1.42e-102	1	1	1	1	1	1	1	3.55e-14	1	1	4.59e-08	1	1	4.62e-37	1	1	1	1	1	1	1	1	1	1	1	1	1.59e-168	1	8.93e-35	7.84e-11	2.63e-14	1	1	1	1	1	1	1	1	1.88e-35	1	2.3e-16
TF7L2	2e-11	1	1.63e-09	1	1	1.69e-10	2.16e-126	1	1	1	1	1	1	1	1	5.51e-08	1	6.67e-08	1	1	1.76e-25	1	1	1	1	1	1	1	1	1	1	1	1	1.92e-74	1	5.37e-31	3.78e-11	1	1	1	1	1.54e-53	1	8.86e-12	1.63e-09	1	5.18e-42	1	1.46e-15
TFAP4	1	1	3.69e-14	1	1	8.6e-14	1	1	1	1	1	1	1	1	1	1.14e-17	1	1	1	3.35e-09	1	1	1	1	1	1	1	1	1	1	1	1	1	5.2e-29	1	1	1	1	1	1	1	9.49e-13	1	2.41e-18	1	1	1	1	1
TFDP1	4.81e-210	1	5.06e-19	1	1	1.52e-18	1	1	1	1	1	1	7.88e-12	1	1	8.77e-19	1	1	7.82e-30	1	1	1	1.77e-13	1	1	1	1	1	1.17e-23	1	1	1	7.53e-17	4.67e-20	1	1	1	3.78e-10	1	1	5.58e-09	1.5e-11	1	1.47e-17	1	1	2.45e-16	3.26e-10	1
TFE2	1.19e-17	1	5.16e-29	1	1	1.94e-38	1.02e-09	1	1	1	1	1	1	1	1	2.5e-32	1	1	1	4.19e-08	1	1	1	1	1	1	1	1	1	1	1	1	3.14e-16	1.09e-46	1	1	1	0.000178	1	1	1	4.67e-17	1	4.37e-31	1	1	1	1	1
TFE3	2.47e-60	1	1.7e-28	1	1	1.45e-14	1	1	1	1	3.02e-09	1	2.96e-20	1	0.000266	2.05e-12	1	1	1	1	1	1	5.31e-60	1	1	1	1	1	1	1	1.96e-10	1	5.76000010350621e-318	9.99988867182683e-321	1	1	1	1.93e-08	1	1.23e-08	2.39e-12	2.6e-31	3.65e-09	2.56e-13	1	1	8.99e-10	1	1
TFEB	1	1	1	1	1	1	1	1	1	1	1	1	1	1	1	1	1	1	1	1	1	1	1.44e-10	1	1	1	1	1	1	1	1	1	4.57e-26	4.65e-81	1	1	1	1.2e-19	1	1	3.3e-08	1	1	1	1	1	1.21e-33	1	1
TGIF1	2.66e-97	1	1.95e-76	1	1	2.57e-63	1	1	1	1	1	1	3.11e-21	1	1	5.62e-82	1	1	1.08e-08	1	3.57e-35	1	8.65e-22	1	1	1	1	1	1	1	1	1	5.95e-23	1.29e-63	1	1	0.000125	3.08e-08	1	1	6.23e-09	1.79e-58	1.29e-09	3.18e-68	1	1	8.62e-12	1	1
THA	2.33e-18	1	5.43e-19	1	1	3.53e-29	2.5e-13	1	1	1	1	1	1	1	1	4.51e-25	1	3.44e-10	1	6.45e-11	1	1	1	1	1	1	1	1	1	1	1	1	2e-09	1.78e-37	1	1	1	1.86e-30	1	1	3.98e-21	1.78e-20	1.57e-20	2.57e-25	1	1	1	1	1
THA11	2.31e-19	1	4.6e-13	1.4e-24	1	2.6e-13	1	1	1	1	1	1	1	1	1	4.12e-16	1	1	1	1	1	1	2.26e-09	1	1	1	0.000209	1	1	1	4.29e-130	1	7.6e-48	1.23e-138	4.23e-09	1	1	9.1e-08	1	1	1	3.15e-09	1	6.83e-16	1	1.21e-21	1	1	1
THAP1	0.000128	1	5.64e-88	1	1	6.45e-17	1	1	1	1	1	1	1	1	1	7.04e-14	1	1	1	1	1	1	1	1	1	1	1	1	1	1	1	1	2.29e-11	1.86e-24	1	1	1	1	1	0.000236	1	9.15e-54	1	5.65e-15	1	1	1.98e-19	1	1
THB	1.17e-31	1	1.08e-10	1	1	2.49e-16	7.92e-14	1	1	1	1	1	1	1	1	4.09e-13	1	1	1	1	1	1	1	1	1	1	1	1	1	1	1	1	1	1.37e-26	1	1	1	1	1	1	1	1.98e-10	1.8e-15	7.09e-12	1	1	6.14e-09	1	1
TWST1	1	1	7.28e-08	1	1	6.32e-08	1	1	1	1	1	1	1	1	1	1.07e-08	1	1	1	1	1	1	1	1	1	1	1	1	1	1	1	1	1	2.06e-12	1	1	1	7.78e-08	1	1	1	2.07e-10	1	1.1e-08	1	1	1	1	1
TYY1	1	1	3.86e-14	1	1	6.8e-11	1	1	1	1	1	1	1	1	1	3.18e-13	1	1.49e-09	1	1	1	1	1	1	1	1	1	1	1	1	1	1	1	1	1	1	1	1	1	1	1	1.13e-09	1	1.96e-12	1	1	1	1	1
USF1	4.31e-10	1	3.02e-33	1	1	1.16e-11	1	1	1	1	1	1	1.39e-13	1	1	8e-10	1	1	1	1	1	1	3.39e-35	1	1	1	1	1	1	1	3.11e-08	1	5.36e-219	9.99988867182683e-321	1	1	1	1.4e-09	1	1	2.27e-13	2.71e-33	1	1.93e-11	1	6.67e-08	2.08e-10	1	1
USF2	1.15e-12	1	6.07e-36	1	1	1.55e-13	1	1	1	1	1	1	1.2e-14	1	1	2.24e-11	1	1	1	1	1	1	1.01e-36	1	1	1	1	1	1	1	3.69e-08	1	1.87e-228	9.99988867182683e-321	1	1	1	2.91e-09	1	1	3.59e-12	8.68e-31	1	1.67e-11	1	1	1.72e-10	1	1
VDR	9.68e-10	1	1	1	1	1	1	1	1	1	1	1	1	1	1	1	1	1	1	3.94e-13	3.75e-09	1	1	1	1	1	1	1	1	1	1	1	1	4.3e-49	1	1	1	1.33e-16	1	1	3e-12	1	1	1	1	1	2.53e-19	1	1
VEZF1	1.59e-121	1	1	1	1	1	8.13e-140	1	1	1	1	1	1	1	1	1	1	1	1	1	1	1.73e-17	5.27e-20	1	1	1	1	1	1	1	1	1	1	1	1	1	1	1	1	1	1	1	1	1	1.4e-08	1	1	1	5.63e-11
WT1	2.36e-39	1	1	1	1	6.75e-08	1	1	1.02e-10	1	1	1	1	1	1	6.28e-10	1	1	2.82e-09	1	1	2.16e-11	4.92e-10	1	1	1	1	1	5.09e-40	1	1	1	4.89e-10	1.53e-13	1	4.55e-08	1	1	1	4.25e-15	1	1e-08	1	8.55e-08	1	1	1	1.65e-17	3.33e-08
Z324A	1.02e-50	1	1	1	1	2.95e-08	5.12e-29	1	1	1	1	1	1	1	2.93e-13	1	1	1	1	1	1.96e-37	5.13e-12	1	1	1	1	1	1	1.55e-09	1	1.64e-21	1	0.00014	3.08e-63	1	1	1	1	1	3.24e-11	1	1	1	1	1	1	2.21e-11	1	1
Z354A	5.42e-09	2.62e-08	2.03e-11	1.51e-10	1	2.32e-09	7.11e-23	0.000228	1	6.31e-10	1	1	1	2.24e-08	1	1.66e-09	1	8.94e-09	6.32e-08	1	1	4.13e-28	2.8e-08	1	1	1	8.7e-09	1	4.13e-12	1	1	1	7.49e-08	4.97e-33	1.61e-08	1	1.75e-10	1	1	1.4e-11	1	6.51e-08	1	1.34e-08	3.3e-23	1	9.44e-12	4.54e-12	8.77e-09
ZBT14	1.01e-19	1	1.03e-10	0.000137	1	6.84e-15	1	1	1	1	1	1	1	1	1	4.52e-12	1	1	1	1	1	1	2.05e-15	1	1	1	1	1	1	1	1	1	1.26e-18	4.11e-33	1.84e-08	1	1	1.27e-12	1	1	1	1.61e-10	1	5.59e-14	1	4.59e-10	8.56e-19	1	1
ZBT17	4.04e-61	1	2.56e-17	1	1	2.88e-22	1.92e-16	1	4.17e-11	1	1	1	8.05e-08	1	1	1.07e-19	1	1	2.94e-16	1	1	5.26e-17	1	1	1	1	1	1	9.87e-36	1	1.47e-18	1	6.18e-11	3.17e-162	1	2.05e-09	4.53e-15	1	1	3.64e-12	1	1.79e-18	1	1.51e-21	1	1	1	6.49e-24	4.13e-09
ZBT18	3.72e-15	1	1.97e-65	1	1	9.81e-80	4.55e-08	6.06e-08	1	1	1	1	1	1	1	3.78e-82	1	3.02e-08	1	1.8e-10	1	1	1	1	1	1	1	1	1	1	1	1	1	5.8e-30	1	1	1	1	1	1	4.67e-12	8.13e-41	1	2.91e-79	1	1	2.45e-16	1	0.000273
ZBT48	3.35e-11	1	8.08e-18	1	1	9.91e-17	1.5e-17	1	1	1	1	1	1	1	1	1.87e-20	1	5.22e-14	1.76e-08	1	1	3.8e-10	1	1	1	1	1	1	3.38e-11	1	1.72e-15	2.88e-10	9.59e-11	1.39e-52	1	1	1	1.92e-10	1	2.86e-08	1.09e-09	5.04e-15	1	2.84e-23	1	1	3.96e-15	7.66e-09	1
ZBT7A	1.31e-24	1	2.39e-10	1	1	1.77e-08	5.32e-14	1	1	1	1	1	1	1	1	1	1	1	1	1	1	1	1	1	1	1	1	1	7.04e-15	1	1	1	5.81e-12	6.65e-17	6.28e-09	1	1	5.33e-19	1	1	1.59e-12	5.7e-08	1	3.62e-08	1	1	5.72e-16	5.13e-08	1
ZBTB6	2.43e-156	1	1.45e-31	1	1	3.68e-43	1.32e-12	1	1	1	1	1	1	1	1	5.25e-42	1	1	1	1	1	1	1	1	1	1	1	1	1	1	1	1	1	3.53e-28	1	1	1.42e-12	1	1	1	6.9e-09	7.3e-36	1	1.01e-43	1	1	1.96e-15	8.5e-08	1
ZEB1	1.63e-49	1	2.1e-25	1	1	1.02e-40	5.38e-29	1.65e-08	1	1	1	1	1	1	1	1.53e-25	1	1	1	1	1	1	1	1	1	1	1	1	1	1	1	1	4.54e-08	7.36e-49	1	1	1	1	1	1.49e-11	1	1.02e-22	1	4.43e-27	1	1	1.38e-09	0.000225	1
ZFP28	1.1e-56	1	2.32e-08	1	1	1	1	1	1	1	1	1	1	1.83e-08	1	8.19e-08	1	1	1	1.05e-27	1	2.75e-09	1	1	1	1	1	1	1	1	1	1	1	5.23e-12	1	2.37e-16	1.97e-08	1	1	0.000227	1	5.24e-09	1	1	1	1	1.27e-08	1.3e-11	8.95e-10
ZFP42	4.03e-19	1	6.4e-25	1	1	3.77e-28	1	1	1	1	1	1	1	1	1	3.92e-36	1	2.84e-09	1	1.11e-09	1	1	1	1	1	1	1	1	1	1	4.27e-55	1	3.02e-17	2.32e-228	1	1	1	1	1	1	1	7.73e-26	1	8.1e-31	1	1	1	1	1
ZFP82	2.84e-08	1	1	8.04e-09	1	1	3.99e-64	1	1	1	1	1	1	1.19e-08	1	4.84e-09	1	2.46e-08	1	1	4.07e-26	3.3e-37	5.37e-08	1	1	1	1	1	7.25e-08	1	1	1	1.32e-09	4.95e-16	1	4.84e-11	1	1	1	1	1	1	1	1	2.47e-31	1	2.8e-09	4.42e-09	3.06e-13
ZFX	1	1	3.11e-58	1	1	6.76e-83	7.09e-20	1	1	1	1	1	3.05e-09	1	1	7.92e-69	1	4.09e-11	1	1	6.63e-28	1	3.21e-11	1	1	1	1	1	1	1	1	1	6.93e-15	1.24e-28	1	1	1	1.24e-10	1	1	1.05e-10	1.13e-35	1	2.9e-71	1	1	6.71e-15	1	1
ZIC1	4.07e-47	1	9.53e-15	1	1	1.2e-11	8.98e-21	4.17e-14	1	1	1	1	1	1	1	7.93e-16	1	1	1.37e-10	1	1	1.17e-10	1.03e-18	1	1	1	1	1	7.46e-17	1	8.97e-09	1	1	2.98e-139	1	1	1	1	1	1	1.24e-09	1.22e-08	1	1.63e-10	1	1	7.56e-14	2.7e-08	2.09e-08
ZIC3	5.78e-27	1	5.56e-29	1	1	7.08e-26	1.96e-19	1	1	1	1	1	1	1	1	8.95e-35	1	1.98e-09	1	1.07e-09	1	1	1	1	1	1	1	1	1	1	1	1	1	6.5e-128	1	1	1	1	1	1	1	1.16e-34	1	1.04e-27	1	1	1	1	1
ZIM3	5.18e-08	1	2.21e-12	1	1	3.71e-13	2.4e-30	1	1	1	1	1	1	1	1	1	1	1	1	1	2.83e-08	1	1	1	1	1	1	1	1	1	1	1	1	5.77e-11	1	1.04e-08	1	1	1	1	1	1	3.71e-08	1	1	1	1	1	6.08e-08
ZKSC1	1.68e-18	1	9.12e-12	1	1	2.9e-16	9.13e-20	1	1	1	1	1	1	1	1	1.15e-15	1	1	1	1	1.58e-09	1	1	1	1	1	1	1	1	1	1	1	1	1	1	1	1	1	1	1	1	6.63e-13	1	1.56e-13	1	1	1	1	1
ZN121	9.99988867182683e-321	1	1.98e-08	1	1	1	1	1	1	1.22e-10	1	2.17e-13	1	3.32e-23	1	0.000116	1	1	1	1	1	1	1	8.22e-08	1	1	1	1	1	1	1	1	1	6.42e-09	1	1	6.63e-13	1	1	3.31e-15	1	1	1	1	1	1	1	1	1
ZN134	1	1	1.27e-13	1	1	4.91e-09	4.43e-09	1	1	1	1	1	1	1	1	1.71e-09	1	1	1	1	1	1	1	1	1	1	1	1	1	1	1	1	1	2.59e-51	1	1	1	1	1	1	6.36e-08	1.23e-13	1	2.08e-08	1	1	8.56e-13	1	1
ZN136	2.15e-12	1	1	1	1	1	1	1	1	1	1	1	1	1	1	0.000165	1	1	1	1	1	1	1	1	1	1	1	1	1	1	1	1	1	4.99e-13	1	1	1	1	1	1	1	1	1	1	1	1	1	1	1
ZN140	2.99e-13	1	6.26e-59	1	1	4.39e-63	5.5e-08	1	1	1	1	1	1	4.18e-08	1	1.7e-69	1	1.81e-09	1	1	1	1.25e-40	4.24e-11	5.83e-16	1.26e-14	1	1	1	1	1	8.53e-10	1	1.46e-08	8.28e-70	1	1	1	1	1	1	1	2.6e-41	1	2.57e-60	1.4e-26	1	1	1	1.1e-10
ZN143	3.33e-25	1	4.37e-13	2.86e-24	1	1.22e-11	1	1	1	1	1	1	1	1	1	1.43e-10	1	1	1	1	1	1	0.000122	1	1	1	1	1	1	1	1.49e-123	1	6.62e-42	1.01e-147	0.000195	1	1	5.5e-08	1	1	1	6.58e-08	1	3.84e-11	1	6.7e-21	1	1	1
ZN214	1.31e-10	1	1	1	1	1	6.61e-08	1	1	1	1	1	1	1	1	4.69e-08	1	1	1	1	2.55e-30	4.57e-23	1	1	1	1	1	1	1	1	1	1	1.1e-09	3.02e-11	1	1	0.000176	1	1	1	1	1	1	1	1.28e-25	1	1	1	9.48e-10
ZN250	1	1	1	1	1	1	1	1	1	1	4.08e-11	1	1	1	1	1	1	1	1	1	1	1	1	1	1	1	1	1	1	1	1	1	1	1	1	1	1	1	1	1	1	1	1	1	1	1	1	1	1
ZN257	6.81e-67	1	1.79e-25	1	1	7.48e-32	1.13e-24	1	1	1	1	1	1	1	1	5.64e-25	1	1	1	1	1	1	1	1	1	1	1	1	1	1	1	1	0.000179	2.67e-36	1	1.89e-12	1	5.01e-10	1	1	1	6.14e-27	1	2.82e-24	1	1	1	1	6.35e-08
ZN260	1	1	1	1	1	1	1	1	1	1	1	1	1	1	1	1	1	1	1	1	1	5.06e-12	1	1	1	1	1	1	1	1	1	1	1	1	1	1	1	1	1	1	1	1	1	1	6.2e-14	1	1	1	2.99e-08
ZN263	1.43e-57	1	1.57e-18	1	1	4.29e-19	1.62e-19	1	1.75e-13	1	1	1	1	1	1	3.19e-22	1	1	1	1	1	1	1	1	1	1	1	1	5.82e-29	1	1	1	1	7.61e-16	1	1.91e-16	1	1	1	1.64e-10	1	4.5e-12	1	5.12e-19	1	1	0.000132	4.49e-13	2.51e-14
ZN264	8.46e-25	1	1.84e-51	1	1	2.91e-17	1.77e-09	1	1	1	1	1	1	1	1	3.6e-15	1	2.71e-09	1	1	0.000175	0.00023	1	1	1	1	1	1	1	1	1	1	1	1.21e-56	1	1	1	5.88e-26	1	1	2.95e-32	2.02e-53	1	2.55e-15	4.51e-15	1	1.73e-31	1	1
ZN274	1	1	1	1	1	1	1.03e-293	1	1	1	1	1	1	1	1	1	1	1	1	1	0.00015	4.26e-11	1	1	1	1	1	1	1	1	1	1	1	8.34e-76	1	1	1	1	1	1	1	3.99e-09	1	6.19e-09	4e-11	1	1	1	1
ZN281	9.47e-28	1	1	1	1	1	1	1	0.000179	1	1	1	1	1	1	0.000209	1	1	2.39e-08	1	1	8.87e-09	2.47e-08	1	1	1	1	1	4.78e-18	1	5.73e-12	1	1.43e-13	3.12e-188	1	1	1	1	1	1	1	1	1	6.5e-08	1	1	1	2.87e-10	1
ZN317	1	1	2.6e-17	1	1	4.21e-13	4.33e-09	1	1	1	1	1	1	1	1	3.73e-19	1	1	1	1	2.2e-09	1	1	1	1	1	1	1	1	1	1	1	1	1.85e-125	1	1	1	1e-11	1	1	1	2.31e-15	1	1.11e-14	1	1	0.000141	1	1
ZN320	1	1	1	1	1	8.3e-11	1	1	1	1	1	1	1	1	1	3.41e-08	1	1	1	1	1	1	1	1	1	1	1	1	1	1	1	1	1	4.88e-15	1	1	1	1	1	1	1	1.42e-08	1	1.21e-10	1	1	1	1	1
ZN322	5.86e-10	1	4.51e-34	1	1	2.08e-11	1	1	1	1	1	1	1	1	1	9.55e-09	1	1	1	1	1	1	1	1	1	1	1	1	1	1	1	1	0.000219	6.52e-16	1	1	1	1	1	1	7.13e-08	2.19e-22	1	1.32e-09	1	1	1	1	1
ZN329	1	1	1	1	1	1	1	1	1	1	1	1	1	1	1	1	1	1	1	1	1	1	1	1	1	1	1	1	1	1	1	1	1	1	1	1	1	1	1	1	1	1	1	1	1	1	1	1	1
ZN331	1	1	1	1	1	1	1	1	1	1	1	1	1	1	1	1	1	1	1	1	1	1	1	1	1	1	1	1	1	1	1	1	1	1	1	1	1	1	1	1	1	1	1	1	1	1	1	1	1
ZN335	5.72e-13	1	2.09e-31	1	1	3.65e-10	1	1	1	1	1	1	1	1	1	1.56e-12	1	1	1	1	1	1	1	1	1	1	1	1	0.000185	1	1	1	1	1	1	1	1	1	1	0.000273	1	4.16e-23	1	2.11e-10	1	1	1	1	1
ZN341	1	1	6.92e-133	1	1	2.64e-149	1.47e-66	1	1	1	1	1	1	1	1	8.36e-163	1	1	2.44e-18	1	8.34e-08	3.06e-10	1	1	1	1	1	1	3.67e-18	1	1	1	1	1.13e-33	1	0.000186	7.89e-08	1	1	0.000127	1	6.92e-111	1	2.06e-156	0.000257	1	7.61e-08	6.32e-10	1
ZN350	1	0.000174	1	7.57e-13	1	1	1	1	1	7.94e-08	7.98e-08	1	1	9.38e-17	6.21e-10	6.7e-22	1	2.23e-20	8.09e-28	1	4.94e-22	1	1	1	1	1	0.000192	1	2.09e-09	1	1	1	1	9.99988867182683e-321	1.25e-09	1	1	6.87e-12	4.92e-09	1.21e-12	3.29e-14	1	3.17e-08	1	1	1	3.96e-20	5.6e-13	1
ZN382	1	1	1.54e-09	1	1	4.26e-08	1	1	1	1	1	1	1	1	1	1.82e-11	1	1	1	1	1	1	1	1	1	1	1	1	1	1	1	1	1	1	1	1	1	1	1	1	1	2.93e-09	1	5.35e-10	1	1	1	1	1
ZN384	1.2e-46	1	1	1	1	1	6.07e-25	1	1	1	1	1	1	0.000247	1	2.14e-08	1	3.17e-09	1	1	3.12e-13	1	1	1	1	2.65e-20	1	1	1	1	1	1	1	1	1	1.52e-46	1.65e-11	2.76e-08	1	1	1	1	1	7.62e-08	1	1	1.39e-13	1	2.44e-20
ZN394	1.98e-24	3.95e-10	3.94e-08	1.19e-12	1	1.79e-09	1.24e-08	1	1	1.93e-08	1	1	1	9.39e-11	1	3.7e-13	1	1.27e-09	2.18e-09	1	1.47e-27	1.39e-47	1	1	1	1	0.000128	1	7.68e-14	1.55e-08	1	1	7.42e-09	1.24e-30	4.32e-08	1.65e-14	6.52e-14	1.7e-08	1	8.1e-11	1	1.72e-08	1.79e-10	2.82e-10	6.78e-43	1	4.14e-13	2.9e-12	1.19e-12
ZN418	1	1	8.82e-10	1	1	2.29e-09	7.08e-27	1	1	1	1	1	1	1	1	1.98e-08	1	5.46e-11	1	1	7.79e-40	4.02e-10	1	1	1	1	1	1	1	1	1	1	1	8.91e-222	1	1.94e-11	1.41e-11	1.06e-10	1	1	4.07e-08	9.88e-09	1	9.22e-10	2.41e-14	1	4.81e-17	1	2.27e-10
ZN436	1	1	1	1	1	1	1	1	1	1	1	1	1	1	1	1	1	1	1	1	1	1	1	1	1	1	1	1	1	1	1	1	1	1	1	1	1	1	1	1	1	1	1	1	1	1	1	1	1
ZN449	2.99e-75	1	1.19e-24	1	1	4.39e-45	3.02e-09	1	1	1	1	1	1	1	1	8.55e-35	1	1	1	1	1	1	0.000221	1	1	1	1	1	1	1	1.46e-17	1	1.34e-10	1.06e-136	1	1	1	1	1	1	5.18e-08	1.11e-19	1	3.62e-35	1	1	1.25e-13	1	1
ZN467	4.22e-37	1	3.71e-09	1	1	3.76e-08	2.53e-30	1	2.48e-12	1	1	1	1	1	1	7.85e-10	1	1	0.000127	1	1	3.94e-09	1	1	1	1	1	1	1.12e-29	1	1	1	1.48e-10	2.93e-24	1	0.000142	1.6e-09	1	1	7.43e-11	1	1	1	1.65e-08	0.000151	1	1	6e-15	1
ZN490	1	1	1	1	1	1	1	1	1	1	1	1	1	1	1	1	1	1	1	1	2.81e-08	1	1	1	1	1	1	1	1	1	1	1	1	1	1	1	1	1	1	1	1	1	1	1	1	1	1	1	1
ZN502	1	1	1	1	1	1	1	1	1	1	1	1	1	8.55e-12	1	1	1	1	1	1	1	2.2e-78	6.98e-14	1	1	1	1	1	1	1	1	1	1e-11	2.89e-08	1	1	1	1	1	1	1	1	1	1	6.17e-40	1	1	1	4.73e-17
ZN528	1	1	2.08e-16	1	1	2.84e-14	8.46e-16	1	1	1	1	1	1	1	1	7.75e-16	1	1	1	1	6.77e-13	1	1	1	1	1	1	1	1	1	1	1	1	1	1	1	1	1	1	1	1	4.42e-10	1	1.6e-13	1	1	1	1	1
ZN547	5.2e-64	1	1.49e-16	1	1	5.49e-11	9.06e-09	1	1	1	1	1	1	1	1	1.31e-10	1	1	1	1	8.29e-18	1	1	1	1	1	1	1	1	1	1	1	1	6.62e-12	1	1	1	1	1	1	1	4.48e-12	1	2.93e-12	1	1	1	1	1
ZN549	1	1	1.58e-25	1	1	9.17e-35	1	1	1	1	1	1	1	1	1	4.85e-27	1	1	1	1	1	1	1	1	1	1	1	1	1	1	1	1	1	5.59e-15	1	1	1	3.4e-09	1	1	1.47e-11	5.93e-15	1	1.01e-24	3.88e-09	1	2.99e-08	1	1
ZN554	1.15e-55	1	7.28e-66	3.15e-11	1	1.04e-87	6.3e-08	0.000118	1	1	1	1	1	1	1	5.3e-85	1	1	5.76e-16	2.22e-08	1	1	1	1	1	1	1	1	1	1	1.19e-17	1	6.82e-24	3.93e-201	1	1	1	0.00018	1	1	1	7.56e-61	1.75e-09	1.63e-88	1	1	6.39e-08	1	1
ZN563	2.69e-28	1	1.65e-72	1	1	5.71e-18	3.05e-08	1	1	1	1	1	1	1	1	1.05e-17	1	1	1	1	1	1	1	1	1	1	1	1	1	1	2.21e-13	1	1	9e-57	1	1	1	1	1	1	1	6.94e-52	0.000125	1.89e-16	1	1	1	1	1
ZN582	1	1	6.65e-09	1	1	2.11e-09	3.08e-11	1	1	1	1	1	1	4.74e-08	1	5.83e-11	1	1	1	1	2.18e-53	1.74e-60	2.13e-11	1	1	1	1	1	1	1	1	1	1.43e-09	1	1	1	1	1	1	1	0.000195	2.86e-08	1	8.07e-09	1.6e-36	1	1	1	2.64e-14
ZN586	1	1	1	1	1	1	1	1	1	1	1	1	1	1	1	1	1	1	1	1	1	1	1	1	1	1	1	1	1	1	1	1	1	1	1	1	1	1	1	1	1	1	1	1	1	1	1	1	1
ZN667	3.89e-38	1	1.15e-09	1	1	9.88e-11	1.39e-20	1	1	1	1	1	1	1	1	4.22e-08	1	9.68e-09	1	1	1	1	1	1	1	1	1	1	1	1	1	1	1	1.27e-33	1	1.13e-15	1	1	1	1	1.1e-10	1.19e-15	1	1.44e-11	1	1	1	1	1
ZN680	1	1	2.15e-15	1	1	2.86e-14	1	1	1	1	1	1	1	1	1	1	1	1	1	1	1	1	1	1.07e-09	7.56e-08	1	1	1	1	1	1	1	1	1	1	1	1	1	1	1	1	2.69e-11	1	1	1	1	1	1	1
ZN708	1	1	3.36e-58	1	1	4.02e-33	2.17e-09	1	1	1	1	1	1	1	1	3.92e-43	1	1	1	1	1	1	1	1	1	1	1	1	1	1	4.46e-08	1	1	2.2e-57	1	1	1	1	1	1	1	1.03e-56	1	6.26e-38	1	1	1	1	1
ZN768	2.89e-18	1	5.08e-14	1	1	3.59e-15	1	1	1	1	1	1	1	1	1	5.08e-14	1	1	1	5.29e-74	5.66e-38	1	1	1	1	1	1	1	1	1	1	1	1	0.000132	1	1	1	1	1	0.000234	1	2.95e-09	1	1.21e-14	1	1	1	1	1.06e-39
ZN770	4.32e-204	1	1.15e-13	1	1.52e-10	5.86e-17	1	1	2.54e-09	1.18e-13	1	6.41e-09	1	1.94e-08	1	1.51e-19	1	1	5.1e-09	0.000144	1	0.00013	1.45e-16	1	1	1	1	1	1.04e-18	1	8.22e-13	1	2.58e-08	2.57e-145	1	1	1	0.000243	1	0.000145	1	3.7e-10	1	1.93e-15	1	1	1	6.51e-12	1
ZN816	1	1	2.73e-30	1	1	1.03e-32	1	1	1	1	1	1	1	1	1	3.44e-36	1	1	1	1	7.6e-12	1	1	1	1	1	1	1	1.82e-09	1	1	1	1	8.97e-112	1	1	1	5.68e-10	1	1	1	5.04e-18	1	2.43e-32	1	1	5.17e-24	1	1
ZNF18	4.04e-31	1	7.23e-24	1	4.66e-10	3.3e-28	3.29e-118	1	1	1	1	1	1	1	0.000221	9.55e-27	1	1	1	1	3.4e-23	1	1	1	1	1	1	1	1	1	1	1	1	7.57e-15	1	1	4.56e-20	1	1	1	1	1.09e-24	1	1.5e-21	1	1	4.07e-11	1	1
ZNF41	1	1	5.86e-11	1	1	2.58e-08	1	1	1	1	1	1	1	1	1	0.000152	1	1	1	1	1	1	1	1	1	1	1	1	1	1	1	1	1	1	1	1	1	1	1	1	1	1	1	0.00016	4.07e-08	1	3.93e-09	1	0.000167
ZNF76	3.61e-46	1	4.34e-13	1.74e-15	1	9.64e-14	4.78e-08	1	1	1	1	1	1	1	1	6.09e-21	1	1	1	1	1	1	1	1	1	1	1	1	1	1	1.01e-96	1	1.05e-29	5.79e-116	1	1	1	1	1	1	3.17e-08	5.51e-11	1	1.63e-16	1	4.56e-18	1	1	1
ZNF8	2.97e-20	1	1	1	1	1	1	1	1	1	1	1	1	1.53e-11	1	1	1	2.2e-10	1	1	1	4.05e-19	1	1	1	1	1	1	1	1	1	0.000232	1	1	1	3.88e-09	1	1	1	1	1	1	1	1	1	1	1	1	1
ZNF85	8.09e-29	1	1.9e-24	1	1	7.6e-19	0.000276	1	1	1	1	1	1	1	1	2e-21	1	1	1	1	1.07e-32	1.49e-10	1	1	1	1	1	1	1	1	1	1	1	3.36e-29	1	1	1	5.5e-08	1	1	1	1.13e-13	4.31e-09	1.33e-15	5.88e-13	1	9.27e-11	1	1
ZSC22	1.96e-93	1	3.16e-11	1	1	1	1.14e-13	1	1.1e-14	3.98e-08	1	1	1	1	1	1	1	1	1	1	1	1.1e-10	1	1	1	1	1	1	2.87e-28	1	1	1	1	1.74e-12	1	6.8e-08	1	1	1	1.36e-10	1	8.26e-10	1	1	1	1	1	1.45e-20	1
ZSC31	1.24e-18	1	3.09e-49	1	1	1.47e-56	1	1	1	1	1	1	1	1	1	2.92e-61	1	1	1	1	1	1	1	1	1	1	1	1	9.48e-10	1	1	1	1	9.62e-40	1	1	1	1	1	1	1	5.13e-159	1	2.11e-48	1	1	1.39e-10	1	1
[truncated: 293 more columns]
